## Harnessing Internet Search Data as a Potential Tool for Medical Diagnosis

Gregory J. Downing, Lucas M. Tramontozzi, Jackson Garcia, Emma Villanueva

Innovation Horizons, Inc. Washington, DC, United States

### Abstract

**Objectives:** To explore the potential and challenges of utilizing internet search data in medical diagnosis, focusing on ethical, technical, and policy considerations by assessing the current state of research, identifying gaps and limitations, and proposing future research directions to advance this emerging field.

**Methods:** A comprehensive analysis of peer-reviewed literature and informational interviews with subject matter experts was conducted to examine the landscape of internet search data utilization in medical research. Searches were performed for published peer-reviewed literature in PubMed (October to December 2023).

**Results:** Systematic selection according to predefined criteria resulted in the inclusion of 43 articles of the 2,499 identified citations. The analysis reveals a nascent domain of internet search data research in medical diagnosis, characterized by advancements in analytics and data integration. However, significant challenges such as bias, data privacy, and infrastructure limitations hinder its widespread adoption. Emerging initiatives may offer the transformative potential to reshape data collection methodologies and privacy safeguards.

**Conclusions:** Signals correlating with diagnostic considerations have been identified in certain diseases and conditions, indicating the potential for such data to enhance clinical diagnostic capabilities. However, leveraging internet search data for improved early diagnosis and healthcare outcomes necessitates addressing ethical, technical, and policy challenges effectively. By fostering interdisciplinary collaboration, advancing infrastructure development, and prioritizing patient engagement and consent, researchers can unlock the transformative potential of internet search data in medical diagnosis, ultimately enhancing patient care and advancing healthcare practice and policy.

## Introduction

The transition to an era in which information technology (IT) plays a pivotal role in healthcare is not just an information engineering advancement. It also addresses a substantial medical necessity. Indeed, evidence is emerging that internet searches for medical information may be useful for facilitating the diagnosis of medical conditions. Machine learning models, trained on large datasets of disease symptoms, diagnoses, and outcomes, may predict the diagnosis of a condition or disease with a higher degree of accuracy than traditional diagnostic methods. Furthermore, the integration of internet search data with a patient's medical records may provide an opportunity for enhanced screening to identify early stages of disease formation and progression. In response to nascent research in this area, the Gordon and Betty Moore Foundation is supporting an initiative to explore and evaluate the potential to harness internet search data for making medical diagnoses. This report reflects a component of a comprehensive research endeavor focused on addressing pre-hospital diagnostic delays, which encompass the time lapses preceding a patient's arrival at a healthcare facility where their condition is conclusively diagnosed.<sup>1</sup>

Through a review of the relevant peer-reviewed literature, this report aims to identify key themes and insights to lay the groundwork for understanding the implications of leveraging internet search data that links with health research datasets resulting in innovative methodologies that empower healthcare professionals to make precise and timely diagnoses.

We emphasize that this work does not consider an analysis of a patient's preferences of search engine use for finding health information, and it does not undertake a review of the patterns, trends, and accuracy of patient self-diagnosis through internet searches. Rather, this study identifies the current body of literature from researchers who leverage internet search data to link to other health research data about the individual patient in an attempt to identify a diagnosis. The primary objective of our work is to explore the broader landscape of leveraging internet search data in healthcare and emphasize its potential for assisting clinical care teams in the diagnostic process. We aim to elucidate opportunities, challenges, and promising avenues for researchers to contribute to the enhancement of diagnostic capabilities through the thoughtful application of internet search data. In doing so, we sought a nuanced understanding of the possibilities and limitations within the realm of healthcare diagnostics with a specific focus on leveraging search history data to benefit clinical care teams rather than endorsing or investigating self-diagnosis pathways.

This paper serves to illuminate the research landscape surrounding the potential use of consumer internet search data for early health concern detection, without delving into the clinical validation of such findings. This analysis focuses on the identification of potential diagnostic signals and patterns revealed through this approach. Meanwhile, it is acknowledged that significant challenges and biases exist in discerning such signals amidst the vast array of search queries as an approach to inform the development of predictive models and proactive healthcare

interventions. Through leveraging insights from internet search data, healthcare professionals may enhance their ability to identify early warning signs that may lead to timelier interventions and improved patient outcomes.

## **Background and Evolution of Online Health Information Search**

Traditionally, access to accurate medical diagnosis has been hindered by several key factors. These include geographical barriers, socioeconomic disparities, limited availability of specialized medical professionals, and lack of patient education and awareness. Inequities in access to high-quality healthcare services exacerbate these challenges, often leading to disparities in health outcomes among different populations.

These barriers to access have significant clinical implications. A missed or inaccurate diagnosis can lead to delayed treatment, worsening of the condition, unnecessary treatments, or even mismanagement of a completely different health issue. For chronic conditions, such as diabetes or cardiovascular diseases, delays in accurate diagnosis can result in irreversible health damage or increased risk of complications. In cases of infectious diseases, misdiagnosis not only affects the individual patient but also poses a public health risk.

The historical reliance on direct patient-doctor interactions for medical diagnosis has often failed to bridge these gaps effectively. The emergence of the internet and digital data in the latter part of the 20th century began to alter this landscape. Eysenbach highlighted the early potential of the internet in patient education, setting the stage for an ever-increasing reliance on online health information.<sup>2</sup> However, important questions remain regarding the accuracy of information, how diverse populations can access and benefit from its applications, and privacy protections.

Internet search data represent one of the largest available sources of data about health information people seek. As of mid-2023, the internet search engine Bing processed over 900 million searches per day, and Google's daily search volume was over 8.5 billion queries for the same period.<sup>3</sup> Google has revealed that around 5% of searches on its site are health related.<sup>4</sup> About 77% of persons with a new diagnosis are reported to use search engines as they begin their patient journey.<sup>5</sup> A recent study showed that 15% of internet search queries conducted by individuals with a recent diagnosis were directed to symptoms of a disease before the diagnosis was made.<sup>6</sup> Furthermore, the internet remains a vital information resource for consumers, as evidenced by the fact that since 2013, 15% of all annual search queries made on Google search engines are new and have not been previously used.<sup>7</sup>

These data, taken together, have prompted a series of research projects designed to address the feasibility and utility of using internet search data for seeking health services. The use of patient search data represents one facet of technology being explored to assist in obtaining more timely and accurate data about patient conditions.<sup>8</sup> Remote patient monitoring technologies, social media searches, online symptom trackers, and now, chatbots and large language models (LLMs)

are new and massive data sources being explored for diagnostic application.<sup>9</sup> However, the focus of this paper is on research studies that use internet search data.

## **Building on Population Health Research: Transitioning to Personalized Medicine**

Within the realm of population health, existing literature is available that can assist researchers in approaching the use of internet search data. It is important to clarify that these studies stand apart from others referenced in this paper, because they focus on population health rather than diagnostic search. Although these works do not align directly with diagnostic studies, they are still valuable to researchers within this field because they offer methodologies for leveraging internet search data that can greatly enrich and advance research endeavors. The following studies also delve into how understanding the dynamics of vaccine hesitancy across social media is crucial in addressing concerns and devising strategies to promote vaccine acceptance.

Understanding and forecasting vaccine hesitancy has become increasingly vital within public health initiatives, particularly in the context of mass vaccination drives. Internet search data and social media platforms now play a pivotal role in comprehending the underlying dynamics behind vaccine hesitancy and offer insights into public concerns, misinformation, and sentiments.<sup>10</sup> Leveraging extensive data from search engine logs and social media platforms through machine learning and data analysis provides fresh perspectives on vaccine intentions, behaviors, and concerns. These insights aid policymakers and healthcare professionals in crafting effective strategies to tackle vaccine hesitancy.

For instance, the study “Accurate Measures of Vaccination and Concerns of Vaccine Holdouts from Web Search Logs” showcases the potential of utilizing search engine logs for insightful analysis that addresses the public health concerns of individual patients.<sup>11</sup> By developing a vaccine intent classifier, researchers accurately detect user searches for COVID-19 vaccines that strongly correlating with Centers for Disease Control and Prevention vaccination rates.<sup>11</sup> This approach enables real-time estimation of vaccine intent rates across demographics and regions and reveals granular trends in vaccine-seeking behavior.<sup>11</sup> Moreover, machine learning identifies vaccine holdouts and their inclination toward using untrusted news sources and specific concerns about vaccine requirements, development, and myths.<sup>11</sup> Understanding these concerns among demographic groups unveils variations in hesitancy and sheds light on those crucial moments when individuals transition from being vaccine holdouts to considering vaccination.<sup>11</sup>

Similarly, the study on COVID-19 vaccine hesitancy and increased internet search queries for side effects on fertility following Emergency Use Authorization (EUA) demonstrates the link between public concerns and vaccine uptake.<sup>12</sup> The surge in fertility-related queries post-EUA, fueled by misinformation and unfounded scientific claims propagated on social media, objectively underscores the heightened apprehensions and hesitancy regarding potential side effects that influenced vaccine acceptance rates.<sup>12</sup> These findings emphasize the importance of

addressing specific concerns highlighted by online searches to alleviate hesitancy and promote informed decision-making among the public.

Moreover, research involving empathic engagement with vaccine-hesitant individuals in private Facebook groups highlights the potential for social media platforms to provide a place for health education and discussions.<sup>13</sup> Moderated discussions within such groups positively influenced vaccination intentions and beliefs and represent a promising strategy for combatting vaccine hesitancy.<sup>14</sup>

Additionally, social media policies and interventions play a significant role in mitigating vaccine misinformation. Policies implemented by platforms such as Facebook have demonstrated the ability to reduce the endorsement and reach of anti-vaccine content, indicating the potential impact of such measures to curb misinformation and influence public perception.<sup>15</sup> The systematic appraisal of current social media strategies and the alignment of those strategies with evidence-based practices represent necessary first steps.<sup>16</sup>

However, it is important to note that while these studies effectively utilize search data and social media in understanding vaccine hesitancy and influencing vaccination behaviors, their primary focus revolves around public sentiment, intentions, and behavioral patterns and not on the diagnosis of specific diseases or conditions. The insights derived from these data sources aid in addressing public health emergencies, informing strategies, and tailoring interventions, but they may not directly contribute to diagnosing specific health conditions.<sup>17</sup>

Overall, leveraging internet search data and social media platforms provides invaluable insights into vaccine hesitancy by helping to identify concerns, misinformation, and behavioral trends among the public. These insights can then drive evidence-based strategies to address hesitancy, promote informed decision-making, enhance public health communication, and contribute to the success of vaccination campaigns, thereby potentially curbing the spread of vaccine misinformation during public health emergencies.

## **Literature Review Methodology**

In addition to conducting interviews with key subject matter experts, we pursued a literature search in PubMed abstract and citation databases based on predefined keyword and term combinations. The search was performed October 2, 2023, through October 30, 2023. Our methodologic approach to the literature review included a combination of text-words and Medical Subject Headings (MeSH) commonly associated with Google, Bing, Takeout, internet search, web search, search behavior, diagnosis, disease identification, and diagnostic accuracy. A complete list of search terms can be found in Appendix 1.

This review applied stringent inclusion criteria to identify relevant research studies for analysis according to the PRISMA guidelines. Inclusion was limited to studies that utilized internet search data from Google and Microsoft Bing, which collectively account for more than 90% of

all internet searches.<sup>3</sup> The primary focus of the selected studies was on individual diagnosis and health behavior to ensure a targeted exploration of the application of search data in the context of personal health. Additionally, studies were required to integrate internet search data with other health research datasets to provide a comprehensive and multifaceted perspective on individual health outcomes. This inclusion criterion aimed to capture the synergistic potential of combining search data with other health-related information for a more nuanced understanding of diagnostic processes and health behaviors.

To maintain specificity and relevance to the research focus, certain exclusion criteria were established. Studies falling within the domain of broad population health research were excluded, as the primary interest lay in investigations centered around individual diagnosis and health behavior. Additionally, research solely reliant on social media data without the incorporation of internet search data was excluded from consideration. This exclusion criterion aimed to differentiate the unique contributions of internet search data from other types of online information, ensuring a targeted analysis of the diagnostic implications of utilizing search history. Through the application of these inclusion and exclusion criteria, the study aimed to refine the selection process and pinpoint research studies that closely align with the project's primary focus: leveraging a patient's internet search data for individual diagnosis and providing patients with information to aid in screening.

All articles retrieved from the initial PubMed search were exported and uploaded to Covidence, where duplicates were removed. This facilitated the systematic review process, which was conducted according to predefined inclusion and exclusion criteria. To reduce errors and bias, the authors independently screened the titles and abstracts of the retrieved papers, and full texts of potentially eligible articles were subsequently examined for final inclusion. Throughout the selection process, the authors periodically compared their findings, resolving any discrepancies through discussion and consensus to ensure thoroughness and accuracy in study selection.

Table 1 identifies the inclusion criteria used to screen publications based on title and abstracts.

**Table 1: Inclusion Criteria**

| Criteria      | Inclusion                                                                                                                         |
|---------------|-----------------------------------------------------------------------------------------------------------------------------------|
| Article type  | Peer-reviewed journals. Opinions and commentaries were excluded.                                                                  |
| Article focus | Use of internet search data, both anonymized and fully identified.                                                                |
| Outcomes      | The combined use of health research datasets and internet search histories to identify, predict, or confirm a clinical diagnosis. |
| Time          | January 1, 2005, to October 30, 2023.                                                                                             |
| Language      | English                                                                                                                           |
| Geography     | International                                                                                                                     |

The exclusion criteria for this systematic review were clearly defined to ensure the relevance and quality of included studies:

- Studies, reports, and publications dated prior to January 1, 2005.
- Articles unavailable in full-text format.
- Articles not written in the English language.
- Newspaper articles, opinions, and commentaries.
- Duplicate studies.
- Studies that did not verify a patient's clinical diagnosis following analysis of internet search behavior.
- Studies that focused solely on diagnoses at the population level, without specific individual-level data.
- Articles primarily discussing moral, ethical, or privacy considerations related to the use of internet search data without providing analytical insights from the integration of search and clinical data.

## Results

The search strategy initially yielded 6,427 potential articles, reports, and publications for inclusion from PubMed. Appendix 1 contains the results for each combination of search terms for each of the abstract and citation databases. The PRISMA flowchart of the record selection process is shown in Figure 1. Duplicates were first removed from all articles identified across all searches totaling 3,928 (61% of all results).

A total of 2,499 peer-reviewed articles were selected for screening by title and abstract for inclusion and exclusion consideration following the focused criteria. A total of 2,396 articles were excluded based on the following criteria: commentaries (n=127), focused only on population-level disease identification (n=881), focused predominantly on only the moral, ethical, or privacy considerations for the use of internet search history while not presenting insights from the analysis of search and clinical data (n=27), or only investigated internet search data without confirming a diagnosis from an independent dataset or from the patient directly (n=1,201).

Full text reports were sought for retrieval for the remaining 103 articles; however, a total of six were not able to be retrieved. Of the 98 reports that were obtained, the authors read the full text and excluded 55 reports due to a primary focus on population-level analysis (n=16) or did not confirm a diagnosis from an independent dataset or from the patient directly (n=39). The review and evaluation process resulted in the inclusion of 43 total articles in this scoping analysis. A list and synopses of the final papers included in the analysis are provided in Appendix 2.

**Figure 1. PRISMA Flow for Literature Selection**

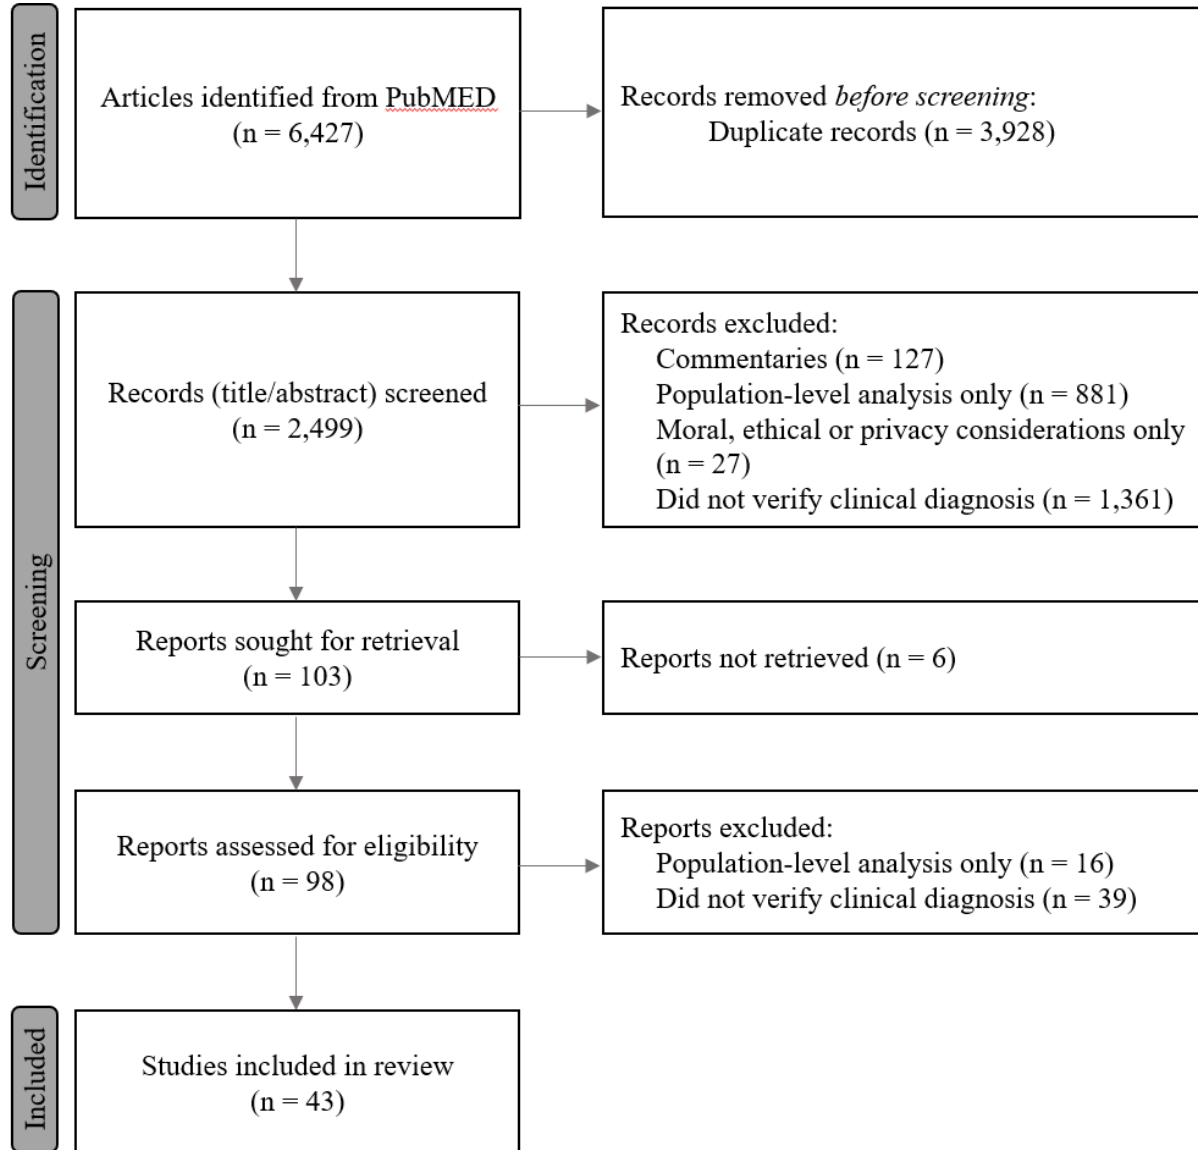

## Key Findings

The primary focus of this paper revolves around exploring the research applications of aggregated internet search data. The exploration of internet search data offers a nuanced perspective into patient behavior that may unveil potential diagnostic signals that are indicative of various health conditions. The papers identified in the literature review, as described below, attempt to identify how internet searches may be useful in identifying diagnostic signals across a range of diseases and conditions.



Within the realm of health and health services queries, three distinct categories have been identified, demonstrating generalizability to both population-based analyses and individual-specific applications based on search content and patterns. While the use of data from **aggregate, anonymized queries** is widespread, particularly in epidemiological and trending studies at the population level, such use lacks intrinsic value in diagnosing specific diseases or conditions for individual patients. Due to the anonymization of these datasets and the absence of specific informed consent from individuals, they fall under exempt research use. Consequently, this paper does not delve into detailed examinations of studies belonging to this first category.<sup>18,19</sup>

The second and third categories of research applications using search queries are the focus of this examination. Both categories include individually consented patient data that may or may not be associated or linked with additional clinical datasets. In the United States, these studies fall under the Common Rule, which defines regulations for federally funded research with human subjects, and the HIPAA privacy rule, which regulates oversight for privacy and security protections if data are linked to personally identifiable information.<sup>20</sup>

The second category includes the use of a **search history that can be applied in predicting future search queries** that may have a strong correlation with health conditions or disease outcomes. One application of this approach involves developing specialized queries associated with a disease or condition and then searching patients' internet search logs with that disease or condition and evaluating the associated symptoms.<sup>21</sup> Researchers can then build statistical classifiers that predict future appearances of the landmark queries based on patterns of signals seen in search logs.<sup>21</sup> Signals in search logs show the possibilities of predicting a forthcoming diagnosis from combinations of subtle temporal signals revealed in the queries of searchers.<sup>21</sup> An example of this type of approach was used in the establishment of patient searches of symptoms associated with pancreatic cancer prior to their clinical diagnosis.<sup>21</sup>

The third category involves the use of peoples' **internet search logs for which they granted consent for researchers** to access and for which they may have permitted linkage to their health data. Most of these forms of applied research have used retrospective analysis to correlate with features of clinical symptoms or diagnostic tests. In several cases, particularly with studies focused on behavioral and mental health conditions, prospective associations with Google and Bing search data series have been aligned with clinical outcomes.<sup>22</sup> Several prospective studies, featuring the use of patients' donated data during an episode of care or longitudinal outcomes studies, have been conducted to assess the predictability of data signatures of clinical presentation or outcome. In the section below, we summarize the findings from peer-reviewed publications representing the research conducted on disease or condition diagnosis using the search history to predict future health searches and patient consented data to link to other health research data. These data represent a promising avenue for health research. Yet, it is important to note a significant drawback: Cohort sizes in studies of linked internet search data with clinical records are typically much smaller compared to those in that only evaluate individual internet search data. This limitation arises due to the nature of individually consented data donation,

where participants voluntarily contribute their search queries. Despite this challenge, studies that go beyond the use of aggregate, anonymized data offer valuable insights, particularly in understanding behavioral and mental health conditions. However, the smaller cohort sizes warrant careful consideration when interpreting results and designing future studies.

Each paper's insights and discoveries are grouped according to the specific health conditions or diseases investigated. This allows for a clear and structured presentation of the research outcomes and the potential diagnostic signals identified across various medical contexts.

### **Evidence of B12 Deficiency in Non-Specific Chronic Pain Through Web-Based Dietary Search Patterns**

The following case studies involve applications of irritable bowel syndrome in the context of public health information, misunderstanding, and patterns of decision-making by individuals. A research study "Evidence From Web-Based Dietary Search Patterns to the Role of B12 Deficiency in Non-Specific Chronic Pain: A Large-Scale Observational Study," by Eitan Giat and Elad Yom-Tov, used a large dataset of internet search patterns to investigate the relationship between vitamin B12 deficiency and chronic pain.<sup>23</sup>

The study aimed to explore the role of vitamin B12 in neuropathy and other neuropsychiatric symptoms using internet search patterns as a proxy for dietary habits.<sup>31</sup> Researchers analyzed search data from 8.5 million people in the United States, focusing on searches related to food and B12 deficiency symptoms.<sup>23</sup> Bing search engine data from October 2016 was used to examine searches for food recipes and terms related to chronic pain and B12 deficiency.<sup>23</sup> The researchers then used a linear classification model to link food consumption data with searches for medical terms and found a strong correlation between food-related search patterns and actual food consumption.<sup>23</sup> Terms related to neurological disorders were more commonly searched for in conjunction with B12-poor foods.<sup>23</sup> The study also discovered that people who searched for B12-rich foods were less likely to search for medical terms associated with B12 deficiency.<sup>23</sup> Among the notable findings, the average estimated B12 consumption for people who inquired about B12 was 2.407 mcg, compared to 2.395 mcg for those who did not, indicating a slight but statistically significant difference.<sup>23</sup>

The study suggests that low vitamin B12 intake may be linked to a broader spectrum of neurological disorders than previously thought.<sup>23</sup> It emphasizes the potential of using internet search patterns for large-scale health studies.<sup>23</sup> The researchers recommend further research to explore the clinical significance of these findings and to confirm the role of B12 in neuropsychiatric symptoms.<sup>23</sup> The researchers also note the importance of considering different sources of meat in assessing dietary B12 intake.<sup>23</sup> This study offers valuable insights into the potential use of internet search data in public health research, particularly in understanding the relationship between diet and disease symptoms.<sup>23</sup>

## **Use of Internet Search Data to Establish Predictive Algorithms for Stroke**

Shaklai et al. evaluated the predictive potential of Bing search queries for impending stroke events in an at-risk population in a healthcare setting in Israel.<sup>24</sup> The study analyzed data from 285 individuals who self-reported a stroke and 1,195 controls, focusing on changes in cognitive traits evident in their internet searches.<sup>24</sup> The study found that certain query attributes, notably related to cognitive function, were predictive of an impending stroke.<sup>24</sup> The model showed high accuracy, particularly as the date of the stroke approached, suggesting that monitoring internet search patterns could offer a valuable tool for early stroke detection.<sup>24</sup>

## **Analysis of Patient Google Search Data Antecedent to an Emergency Department Visit (Non-Disease Specific)**

The study by Asch et al. aimed to explore the potential of Google search histories in predicting emergency department (ED) visits and their correlation with clinical conditions.<sup>25</sup> A total of 103 participants, who consented to share their Google search data collected 7 days prior to the ED visits and electronic medical record (EMR) data, were included.<sup>25</sup> The analysis of 591,421 unique search queries revealed that 37,469 (6%) were health related.<sup>25</sup> In the week prior to an ED visit, 15% of searches were health related, with many directly related to the participants' chief complaints.<sup>22</sup> The study highlights the potential of internet search data in anticipating healthcare utilization and understanding patients' health-related concerns.<sup>25</sup>

## **Internet Search Pattern Associated with Intimate Partner Domestic Violence**

Zaman et al. explored using Google search data to identify intimate partner violence (IPV).<sup>26</sup> The study involved 56 participants who consented to enable researchers to conduct data analyses that revealed distinctive search characteristics between those with and without IPV experiences.<sup>26</sup> The study's conclusions suggest that specific patterns in search behavior, including linguistic attributes and search times, can be indicative of IPV.<sup>26</sup> These findings highlight the potential use of search data as a tool for early detection and intervention in domestic violence cases.<sup>26</sup>

Furthermore, Youngmann and Yom-Tov analyzed queries from Bing search engine data involving over 50,000 individuals based in the United States who were experiencing IPV.<sup>27</sup> They found that about half of these users initiated their searches for IPV-related information following a specific event, such as physical violence or abuse, while approximately 20% actively concealed their interest in IPV.<sup>27</sup> The topics that interested individuals experiencing IPV included the effects of IPV, seeking help, and ways to escape from abusive situations.<sup>27</sup> This research suggests that detecting early signs of IPV through search queries may be challenging, but even in later stages, when many IPV users are identified, interventions such as targeted advertisements to assist people in safely leaving violent situations could be highly beneficial.<sup>27</sup>

## **Cancer**

The research paper "Patterns of Information-Seeking for Cancer on the Internet: An Analysis of Real World Data," by Ofra et al., is one of the first internet query-based research studies that presents a detailed analysis of cancer-related internet searches.<sup>28</sup> The study analyzed Yahoo search engine data over 3 months, involving 50,117 users and 225,675 queries.<sup>28</sup> Significant findings include a correlation between the aggressiveness of the cancer type and the intensity and duration of the search patterns.<sup>28</sup> The study employed statistical tools such as linear regression and Hidden Markov Models to analyze these patterns.<sup>28</sup> Key findings include a stronger focus on treatment information in searches for aggressive cancers, while support groups were more significant in searches for less aggressive cancer types.<sup>28</sup> This research underscores the potential clinical utility and limitations of using internet search data in understanding the information needs of cancer patients and their acquaintances and suggests that while this data offers valuable insights, it may not fully represent the diversity of cancer patients' experiences and needs.<sup>28</sup>

Soldaini and Yom-Tov also demonstrate algorithms that can be designed to identify specific traits of interest in anonymous internet users. The algorithms' applications in the medical domain demonstrate their effectiveness in identifying potential cancer patients based on search patterns and predicting disease distributions within a population and offer valuable insights for early disease screening and epidemiological studies.<sup>28,29</sup>

### ***Use of Internet Search Data by Parents of Pediatric Oncology Patients***

The study "Health-Related Google Searches Performed by Parents of Pediatric Oncology Patients" analyzed the search behaviors of 98 parents of pediatric cancer patients.<sup>31</sup> Key findings included the following: Parents conducted a higher proportion of health-related searches (13%) compared to the general population (5%).<sup>31</sup> These searches peaked around key medical events such as diagnosis and treatment phases.<sup>31</sup>

Within health-related searches, 31% involved symptoms, disease, and medical information, and 29% were related to hospitals and care sites.<sup>31</sup> Cancer-specific searches comprised 18% of the health-related queries.<sup>29</sup> The study emphasized the critical role of the internet in the information-seeking process of parents coping with a child's cancer diagnosis and treatment and highlights parents' overall significant reliance on the internet for healthcare information in pediatric oncology.<sup>31</sup> This reliance underscores the need for accessible, reliable online medical information and indicates potential focus areas for healthcare providers in patient and family education.

### ***Lung Cancer***

The research paper "Evaluation of the Feasibility of Screening Patients for Early Signs of Lung Carcinoma in Web Search Logs," by Ryen W. White and Eric Horvitz, published in *JAMA Oncology*, explores the use of anonymized web search logs for the early detection of lung

carcinoma.<sup>32</sup> The study utilized anonymized search logs from Bing.com involving millions of English-speaking users in the United States.<sup>32</sup> Out of these, 5,443 users who later searched for lung carcinoma symptoms were identified as positive cases.<sup>32</sup> The researchers developed statistical classifiers to predict the appearance of these searches based on earlier search patterns.<sup>32</sup> Their findings showed that certain search behaviors could indicate a higher risk of lung cancer, with true-positive rates ranging from 3% to 57% for different false-positive rates.<sup>32</sup> The study concluded that web search data could potentially aid in early lung cancer detection, highlighting new directions in identifying risk factors and screening opportunities.<sup>32</sup>

The study "The Role of Web-Based Health Information in Help-Seeking Behavior Prior to a Diagnosis of Lung Cancer: A Mixed-Methods Study," by Mueller et al., is a detailed investigation into how online health information influences the diagnostic journey for lung cancer patients.<sup>33</sup> Utilizing both surveys and interviews, the study captured the experiences and behaviors of patients and their next-of-kin.<sup>33</sup> Quantitative methods were used to establish the proportion of lung cancer cases in which pre-diagnosis web searches took place.<sup>33</sup> Qualitative methods were used to explore individuals' perceptions of the impact their web searches had on the pathway to diagnosis, as well as barriers that might prevent individuals from accessing the web for health information prediagnosis.<sup>33</sup> Finally, mixed methods were required, because a survey was needed to screen for relevant individuals for interview as the researchers expected low levels of web use among lung cancer patients.<sup>33</sup> Thus, this study consisted of (1) a cross-sectional, retrospective survey and (2) a qualitative interview study with a subsample of the survey participants.<sup>33</sup> Key findings include that 20.4% of participants engaged in pre-diagnosis web searches, mainly using Google and NHS Direct.<sup>33</sup> These searches played a role in all 3 intervals leading to diagnosis: symptom appraisal, decision-making for seeking healthcare, and interaction with health professionals.<sup>33</sup> The study underscores the growing significance of the internet in early disease detection and patient decision-making processes.<sup>33</sup>

### *Ovarian Cancer*

The research paper "Using Online Search Activity for Earlier Detection of Gynaecological Malignancy" focuses on leveraging Google search data to predict gynecological cancers, particularly ovarian cancer.<sup>34</sup> This study built upon previous research conducted by Soldaini and Yom-Tov, which relied on self-identification in queries for outcomes.<sup>35</sup> However, it is important to note that the present investigation employs clinically verified outcomes, thereby enhancing the robustness and reliability of the findings. The study, conducted from December 2020 to June 2022 at a London University Hospital, involved 235 women who consented to share their Google search history.<sup>34</sup> It aimed to distinguish between search patterns of women with malignant diseases and those with benign tumors and to explore the possibility of earlier diagnosis through these search patterns.<sup>34</sup> The study found notable differences in search patterns up to a year before clinical diagnosis, with a predictive model showing an area under the curve (AUC) of 0.82 for individuals who frequently searched for health-related topics.<sup>34</sup> This research demonstrates the potential of using online search data as a supplementary tool for early cancer detection.<sup>34</sup>

Furthermore, Chen et al. noted that despite the limited datasets in their study, there appears to be a tendency toward heightened online search activity before patients with malignant cases visit a general practitioner.<sup>36</sup>

### ***Pancreatic Cancer***

The research paper "Screening for Pancreatic Adenocarcinoma Using Signals From Web Search Logs," by John Paparrizos, Ryan W. White, and Eric Horvitz, explored the use of web search logs from Bing to predict pancreatic adenocarcinoma.<sup>21</sup> The study involved 9.2 million English-speaking users in the United States and focused on the feasibility of the early detection of pancreatic cancer by analyzing search patterns.<sup>18</sup> In the study, the researchers analyzed anonymized search logs from Bing, looking for patterns that might indicate the early stages of pancreatic adenocarcinoma.<sup>21</sup> They identified users who had searched for symptoms or treatment related to pancreatic cancer and then traced their search history backward, looking for early signals of the disease.<sup>21</sup> This retrospective analysis aimed to see if there were distinctive search patterns before the actual diagnosis.<sup>21</sup> The findings were significant, as they showed the potential of search log analysis to identify early signs of serious illnesses such as pancreatic adenocarcinoma.<sup>21</sup> This method could potentially complement traditional diagnostic methods, offering a novel approach to early disease detection.<sup>21</sup> The research demonstrated that certain search behaviors could be indicative of pancreatic adenocarcinoma, achieving true-positive rates of 5% to 15% with extremely low false-positive rates.<sup>21</sup> This innovative approach suggests a new direction for cancer screening, emphasizing the potential of using web search data in health surveillance and early diagnosis.<sup>21</sup>

### **Mental Health and Behavioral Health**

#### ***Addiction***

Nitzburg et al. utilized internet search data to potentially identify patients seeking drug treatment services for alcohol use disorder, which places a significant burden on healthcare facilities and often necessitates early intervention efforts.<sup>37</sup> Leveraging internet search data, the study explores how medical symptom queries correlate with subsequent searches for Alcoholics Anonymous and Narcotics Anonymous treatment information.<sup>37</sup> Routine office visits to primary care physicians often serve as initial points of contact for problem drinkers, providing an opportunity to motivate them toward alcohol-reduction treatment options. Brief intervention (BI) protocols, integrated into routine care, aim to reduce drinking levels among patients.<sup>37</sup> By analyzing anonymized Bing search data, the study identifies common medical symptoms that precede searches for 12-step programs, shedding light on potential avenues to enhance BI's efficacy in motivating individuals toward seeking treatment.<sup>37</sup> The findings suggest that emphasizing both long-term medical consequences and immediately discomforting symptoms could enhance motivation for seeking addiction treatment. Such insights hold promise for optimizing Screening,

Brief Intervention, and Referral to Treatment protocols, ultimately improving treatment acceptance rates among individuals with alcohol and drug use disorders.

### ***Anxiety and Deteriorating Mental Health***

The trio of studies discussed below present innovative approaches to addressing mental health challenges, with a particular focus on depression and anxiety disorders. In Zhang et al. the researchers explored the potential of utilizing personal online activity histories from platforms such as Google Search and YouTube to detect depressive disorder among college students in the United States.<sup>38</sup> By collecting longitudinal data and employing machine learning techniques, the study established correlations between shifts in online behaviors and worsening mental health profiles during the COVID-19 pandemic.<sup>38</sup> This research highlights the feasibility of leveraging ubiquitous online data for noninvasive surveillance of mental health conditions and offers a promising alternative to traditional screening methods, especially in times of societal disruption.<sup>38</sup>

Zaman et al. expanded the investigation to examine the relationship between changes in Google Search and YouTube engagement behaviors and the exacerbation of depression and anxiety levels among college students during the pandemic.<sup>39</sup> Through longitudinal data collection and correlation analysis, the study identified significant associations between deteriorating mental health profiles and shifts in online behavior and provided insights into the potential use of these behavioral changes as predictive indicators of mental health conditions.<sup>39</sup> These findings underscore the importance of utilizing pervasive online data for real-time monitoring and early intervention in mental health care and offered a cost-effective and scalable approach to complement existing screening methods.<sup>39</sup>

In a third study, Zaman et al. proposed an alternative method for identifying individuals with anxiety disorders and estimating their anxiety levels using personal online activity histories from YouTube and Google Search.<sup>40</sup> By collecting multiple rounds of anonymized data and developing explainable features capturing temporal and contextual aspects of online behaviors, the study demonstrated results in detecting anxiety disorders and assessing anxiety levels. This research presents a cost-effective and scalable framework that holds promise for deployment in real-world clinical settings, empowering care providers and therapists with valuable insights into anxiety disorders and enhancing mental healthcare delivery.<sup>40</sup> Collectively, these three studies highlight the potential of leveraging online data for mental health surveillance and intervention and offer new avenues for improving mental health outcomes on a broader scale.

Youngmann et al. revealed that individuals exhibit distinct information-seeking behaviors when using search engines depending on their level of anxiety and that this is particularly evident in searches for medical symptoms with potentially life-threatening implications.<sup>41</sup> By analyzing mouse tracking data and other user interactions, a model was developed to predict user anxiety levels that achieved significant correlation with the severity of symptoms searched.<sup>41</sup> The

findings underscore the importance of incorporating user anxiety information to accurately measure search engine performance, which is particularly crucial in delivering critical medical information and suicide prevention resources effectively.

### ***Eating Disorders***

Sadeh-Sharvit et al. addressed how leveraging internet search data can meet the urgent need to identify and intervene in cases of eating disorders, given their significant personal and public health costs and the barriers to seeking treatment.<sup>42</sup> Leveraging internet browsing behavior, the research explored whether data from clinically validated online screens can predict the presence of an eating disorder or high risk for this illness.<sup>42</sup> Results suggest that a machine learning algorithm incorporating variables such as age, search activity related to eating disorders, and internet usage patterns can identify women screening positive for eating disorders with moderate accuracy, potentially enabling early intervention efforts to reduce the incidence and prevalence of these disorders. However, the study acknowledges limitations, such as the need for larger sample sizes, the inclusion of diverse populations, and the consideration of ethical and privacy concerns in implementing predictive models for eating disorder detection using internet browsing data.<sup>42</sup>

### ***Mood Disorders and Suicidality***

The research study conducted at Northwell Health system that involved individuals hospitalized for suicidal thoughts and behaviors included 43 participants ages 15-30 with mood disorders and examined their Google search activity prior to hospitalization.<sup>43</sup> The research focused on identifying search patterns related to suicide and behavioral health.<sup>43</sup> Results showed that a significant number of participants searched for suicide-related content and help-seeking information.<sup>43</sup> A majority (27/43, 63%) of participants conducted suicide-related searches.<sup>43</sup> Participants searched for information that matched their planned or chosen method of attempting suicide in 21% (9/43) of cases.<sup>38</sup> Suicide-related search queries also included unusual suicide methods and references to suicide in popular culture.<sup>43</sup> A majority of participants (33/43, 77%) used queries related to help-seeking themes, including how to find inpatient and outpatient behavioral healthcare.<sup>43</sup> Queries related to mood and anxiety symptoms were found among 44% (19/43) of participants and included references to panic disorder, the inability to focus, feelings of loneliness, and despair.<sup>43</sup> The results of this study provide insights into the digital behaviors of young people with mood disorders facing suicidality, highlighting the potential of internet search data in clinical assessment and intervention strategies.<sup>43</sup>

The study "Perceived Utility and Characterization of Personal Google Search Histories to Detect Data Patterns Proximal to a Suicide Attempt in Individuals Who Previously Attempted Suicide: Pilot Cohort Study," conducted at the University of Washington, explored the feasibility and acceptability of using personalized online search data to identify the risk of suicide attempts.<sup>44</sup> It involved 62 participants with a history of suicide attempts.<sup>44</sup> The research analyzed changes in



online search behavior up to 60 days before a suicide attempt, revealing patterns such as increased searches related to suicide methods and expressions of anger.<sup>44</sup> The study highlights the potential of internet search data to identify early warning signs of suicide risk, although participants raised concerns about privacy and accuracy.<sup>44</sup>

### ***Psychosis***

The study "Google Search Activity in Early psychosis: A Qualitative Analysis of Internet Search Query Content in First Episode Psychosis" focused on analyzing Google search queries of individuals before their first hospitalization due to psychosis.<sup>22</sup> This qualitative evaluation aimed to identify common themes and interests during emerging illness.<sup>22</sup> The study involved 20 participants who provided access to their Google archive data.<sup>22</sup> Key findings revealed that 75% of participants searched for mental health-related information.<sup>22</sup> Delusions were a common theme in searches, with 75% of participants exhibiting this in their queries.<sup>22</sup> The study concluded that individuals with early psychosis used the Internet to understand their symptoms before seeking psychiatric care.<sup>22</sup> This highlights the potential for tailoring online resources to improve pathways to care and shorten the duration of untreated psychosis.<sup>22</sup>

Additionally, Aref-Adib et al. investigated the patterns and consequences of online mental health information-seeking behavior among individuals with psychosis and assessed the acceptability of a mobile mental health application.<sup>45</sup> Individuals with psychosis commonly seek mental health information online, which proves beneficial when shared collaboratively with clinicians.<sup>45</sup> However, when not shared, it can impact healthcare decisions.<sup>45</sup> The research underscores the need for a collaborative approach to online health information-seeking, with mental health clinicians encouraging patients to discuss online findings as part of shared decision-making.<sup>45</sup> Findings suggest that individuals with psychosis lead active digital lives, which indicates a potential positive reception for the introduction of a mental health app into services.

### ***Schizophrenia***

The paper "Utilizing Machine Learning on Internet Search Activity to Support the Diagnostic Process and Relapse Detection in Young Individuals With Early Psychosis: Feasibility Study" explored using internet search data to aid in diagnosing and detecting relapses in schizophrenia spectrum disorders (SSD).<sup>46</sup> It involved 42 participants in the Northwell Health System with SSD and 74 healthy volunteers ages 15-35.<sup>46</sup> The study, approved by the institutional review board (IRB), analyzed 32,733 time-stamped search queries.<sup>46</sup> Machine learning algorithms were developed to distinguish between individuals with SSD and healthy volunteers and to predict psychotic relapses.<sup>46</sup> Results showed promising potential for using online search activity as objective data in psychiatric diagnostics and relapse prediction, with classifiers achieving areas under the curve of 0.74 for diagnosis and 0.71 for relapse prediction.<sup>46</sup> Key findings include fewer and shorter searches among SSD participants and specific word use patterns related to

symptoms.<sup>46</sup> This approach represents a novel method for integrating digital data into mental health monitoring and diagnostics.<sup>46</sup>

### **Neurdegenerative Diseases**

Internet search data has also been used in diagnosing neurodegenerative diseases. Austin et al. explored the relationship between internet search behavior and cognitive function in older adults with a particular focus on Alzheimer's disease.<sup>47</sup> By continuously tracking and analyzing search terms, the authors found that individuals with poorer cognitive function exhibited distinct patterns in their online searches, such as using fewer unique terms and employing less common vocabulary.<sup>47</sup> These findings suggest that changes in language use during online searches could serve as early indicators of cognitive decline and could provide opportunities for proactive treatment and intervention before clinical symptoms fully manifest.<sup>47d</sup>

Youngmann et al. developed a machine learning algorithm to screen for Parkinson's disease using data from search engine interactions.<sup>48</sup> By analyzing the textual content of web queries, the classifier successfully identified individuals at high risk for Parkinson's disease.<sup>48</sup> Moreover, longitudinal follow-up revealed that those identified as positive by the classifier showed a higher rate of progression in disease-related features.<sup>48</sup> This innovative approach not only enables large-scale screening for Parkinson's disease but also offers insights into disease progression, potentially facilitating early intervention and management.

Similarly, Yom-Tov et al. investigated the potential of internet search engine interactions in identifying individuals with amyotrophic lateral sclerosis (ALS).<sup>49</sup> By analyzing search engine query data, the authors developed a model capable of distinguishing individuals with ALS from controls and disease mimics with high accuracy.<sup>49</sup> The prospective validation further supported the efficacy of this approach, indicating its potential as a screening tool to reduce diagnostic delays associated with ALS.<sup>49</sup> These studies collectively highlight the value of harnessing internet search data for early detection and management of neurodegenerative diseases and offer promising avenues for improving clinical outcomes and patient care.

### **Nutritional and Metabolic Diseases**

The utilization of internet search data presents a potential avenue for the early detection of nutritional and metabolic diseases such as diabetes. In a study by Hochberg et al., researchers analyzed Bing search engine queries from users in the United States to identify symptoms related to diabetes.<sup>50</sup> Through predictive models, including logistic regression and random forest, the study demonstrated the ability to distinguish between users diagnosed with diabetes and those querying symptoms associated with the disease.<sup>50</sup> The models could detect undiagnosed diabetes patients up to 240 days before they mentioned being diagnosed.<sup>50</sup> This highlights the potential of utilizing search engine data for earlier diagnosis, which is particularly beneficial for conditions such as type 1 diabetes, where early detection is clinically meaningful.<sup>50</sup> Additionally, the study

suggests the possibility of search engines serving as population-wide screening tools and hints at the potential for further improvement by incorporating additional user-provided data.

Similarly, Lebwohl and Yom-Tov investigated the use of internet search term data to identify symptoms prompting an interest in celiac disease and the gluten-free diet.<sup>51</sup> By analyzing Bing search queries in the United States, the study aimed to characterize the set of symptoms and conditions that may indicate an elevated likelihood of subsequent celiac disease diagnosis.<sup>51</sup> While the study identified various symptoms queried before celiac-related searches, including diarrhea, headache, anxiety, depression, and attention-deficit hyperactivity disorder (ADHD), the predictive ability of these searches was limited.<sup>51</sup> However, the study observed an increase in antecedent searches for symptoms associated with celiac disease, shedding light on its diverse clinical manifestations and the challenges involved in identifying effective case-finding strategies.<sup>51</sup> These findings underscore the complex nature of a celiac disease diagnosis and the potential for leveraging internet search data to enhance the understanding and detection of such nutritional disorders.

### **Cross-Cutting Themes, Lines of Evidence, and Gaps in the Current State of Internet Data Search in Diagnosis**

We have conducted an analysis of the peer-reviewed research for anonymized and non-anonymized research using Microsoft Bing or Google search data. The sum of the results reflects a clearly nascent domain of IT and data research in assisting with diagnosis determinations. Nevertheless, the advances in structured data, LLMs, powerful data search engines, analytic platforms, and expanding research experiences of health service investigators in population health and individual patient research are promising. Today, there is no structured way of designing these types of studies to aid in the diagnosis of diseases and conditions. Among the most visionary applications of search data to date are those reflected in the development of disease-specific predictive models for classifying internet search terminologies that may one day be applied in real time for clinical decision-making.

The published research to date addresses feasibility and clinical efficacy (in prospective studies). Of the reviewed studies, none to date has addressed clinical utility. However, for some of the studies, the implications of how the analysis tools and predictive models were used was discussed and, in several cases, the conceptualization for the data representations in clinical health record systems was described.<sup>38-40</sup> Should this type of research eventually demonstrate clinical utility, one could envision the development of patient applications aimed at empowering individuals; however, the use of internet search data for patient applications has policy and research applications that are similar to those of other health systems research such as real-world evidence, remote patient monitoring, and the use of social media. A potential area of research that could benefit from population-level applications is that of rare diseases, where crowdsourcing of queries could be mined for commonalities and integrated with population data,

disease registries, and EMRs. Utilities for identifying patient candidates for clinical trial eligibility and enrollment could also be explored.

We noted that the researchers conducting studies using internet search data and publishing results are from two general domains of health research. Data scientists and research engineers from large technology companies with proprietary technology that supports internet searches have provided methodological innovations in linguistics, mathematics, and information science that open doors for clinical investigations.<sup>27-34, 27-36, 43,46</sup> On the other hand, academically oriented health services researchers who have experience with large dataset analysis for specific health conditions represent the alternative dimension. The research approaches taken differ in terms of anonymization, integration with EMRs or other data that enable individual patients to be studied, the size of the groups studied, and the approach to the methods and tools applied. Moreover, it would seem likely that fostering research that brings important research questions from the clinical and academic settings together in collaboration with the technology engineering domains would likely accelerate and catalyze promising clinical and public health insights.

As one would expect, research questions that are explored using internet search data tend to focus on diseases and conditions that evolve over time (subacute or chronic) with diverse presentations or a wide array of clinical presentations. One challenge that spans the health domains that have been studied using internet search data for diagnosis in the use of consented, retrospective data is that there may be substantial opportunities for bias in the methods applied in consenting, in patient donation, and in other areas. Furthermore, the associations of causal effects through statistical analysis and mathematical examinations in population studies that use anonymous data sources can serve to frame insights that can be evaluated through pilot studies and prospective randomized clinical trials that can address or help minimize the effects of bias in the patient-provided data.

We also note that several studies integrate datasets from other social media platforms, such as Instagram, Yahoo, and Twitter, while still others use Google Takeout data or Microsoft Bing. We found no publications that used Google and Microsoft patient data on the same patients or any studies using the same analytic algorithms. Future work could examine the cross-over effects of patient populations using both data sources because the orientation and structure of the datasets differ.

We note only one study to date that has used a prospective data collection approach that enables patients to contribute data from the beginning of their enrollment moving forward. (Katherine Anne Comtois, PhD, University of Washington, personal email correspondence, December 26, 2023) It is unclear whether the search patterns differed in patients who donated their data before the start of the study (retrospective) versus patients who engaged in prospective data donations. The publications we examined do not provide details on the mathematical methods used in the classification of terms (there appears to be no consensus or best practice for annotating such data). As a result, reproducing study results may be difficult. We found no publications that have

made anonymized research datasets created from their study data available to other researchers for examination. The most detailed descriptive methods publications provide are supplemental data that include the search patterns, common terms, and other details regarding data classification. Future research may encourage more open data policies, including the provision of metadata and the descriptive characteristics of the study populations that would allow others to validate and build on the pilot studies that shape hypothetical associations for detecting and predicting diseases and health conditions.

While the initial clinical domain of disease diagnosis captured in the early literature was in cancer diagnosis,<sup>34</sup> the research has broadened to additional areas of interest, including mental health and behavioral health.<sup>35-46</sup> The ability to obtain search data from patients provides researchers with seemingly valuable insights into the patterns of thought, the periodicity of searching patterns, and the thematic aspects of research. Perhaps the most significant domain of search in these studies is in queries that address the patient's intent to harm oneself or others. A series of studies aimed at integrating patient behavior in social media, online activities, and engagement in risk-taking behavior are now underway to evaluate their utility in understanding patient management applications. In these domains, the clinical utility is not so much focused on diagnosis as on monitoring the patient's status for management and on using search data as an integral tool to intervene or make therapeutic changes in clinical regimens. Several of these studies are now being sponsored by government or non-governmental research organizations, marking a milestone for non-industry sponsorship of internet search data application.<sup>1</sup>

From the articles we reviewed and the informational interviews we conducted with researchers with subject matter expertise, there appears to be a consensus that assistance with infrastructure development would benefit researchers in designing their studies. In this paper, we have summarized the research findings on tools that have been created to harness massive datasets and enable their integration with other datasets, including those with EMR data. We also noted a need for broader information about the nature of the search datasets that are available, the best practices for individuals to manage their various datasets with researchers, and the conditions under which their data can be shared. Given the concerns regarding data privacy and security for large datasets in the consumer marketplace and the interplay of these data with HIPAA-regulated data in clinical settings, benefit to the researcher and patient advocacy community could be achieved by establishing best practices and informational resources to guide future research design, oversight, and patient benefits from the use of their data.

## **Tools Developed to Assist Researchers in the Use of Search Data**

Researchers have created tools that enable the effective analysis and utilization of internet search data, facilitating investigations into internet search studies. The creation of these tools was prompted by the need to access and harness the potential of such data comprehensively. Their integration has notably eased the identification of early signs of issues, ensured user privacy, and streamlined the investigative process. A complete listing of these tools can be found in Table 2.

Innovation in these methods and tools makes the research less difficult and often lowers the barriers for other researchers to be more successful in their search endeavors, as has been the case in other research domains with novel data sources, such as genomic datasets.

The gTAP Web App serves as a crucial tool that prioritizes data privacy and security.<sup>44</sup> Allowing participants to download their data without the need to share personal credentials ensures a higher level of user trust and confidentiality.<sup>44</sup> This feature encourages participation in studies involving symptom analysis and diagnostics, fostering a collaborative environment between researchers and users while maintaining data integrity.<sup>44</sup>

LIWC, a text analysis software package, has exhibited remarkable potential in differentiating linguistic attributes within search logs.<sup>26</sup> Previous research has successfully employed LIWC in psycholinguistic analysis to uncover signals of abuse and domestic violence.<sup>26</sup> By identifying linguistic patterns indicative of emotional, sexual, or physical abuse, LIWC serves as an instrumental tool in early symptom identification, providing valuable insights for healthcare professionals and researchers.<sup>26</sup>

The Google NLP API plays a pivotal role in ensuring data privacy and anonymization.<sup>52</sup> By automatically detecting and removing personally identifying information from search history data, this API safeguards the confidentiality of individual study participants.<sup>33</sup> This feature enables researchers to delve into symptom analysis and diagnostics using real-world data while upholding ethical standards and privacy regulations.<sup>53</sup>

As a powerful tool from Meta, CrowdTangle aids in monitoring, analyzing, and reporting social media activities.<sup>7</sup> Its effectiveness in offering transparency across various social media platforms positions it as an invaluable resource for understanding public discourse and sentiment regarding health-related symptoms and conditions.<sup>7</sup> Analyzing trends and discussions can offer preliminary insights into prevalent health concerns and emerging symptoms.<sup>7</sup>

LDA and DLATK represent cutting-edge methodologies in text analysis.<sup>54</sup> LDA's ability to generate semantically coherent topics from social media posts enables the identification of clusters of words sharing contextual relevance.<sup>54</sup> Meanwhile, DLATK's capacity to determine the relative frequency of user words and phrases helps retain crucial variables and phrases for analysis.<sup>36</sup> Both tools are pivotal in uncovering patterns and trends in language use, aiding in the identification of potential symptoms or health-related discussions.<sup>54</sup>

Another tool being leveraged by researchers is the AI chatbot GPT-4 (developed by OpenAI).<sup>55</sup> In a recent diagnostic study evaluating AI capabilities, the use of GPT-4 showcased remarkable proficiency in certain diagnostic scenarios.<sup>55</sup> Comparing the LLM's performance with a broad survey of human clinicians, the study revealed that the LLM surpassed human clinicians in accurately determining pretest and posttest probabilities following a negative test result across 5 cases.<sup>55</sup> However, its performance was comparatively less robust after positive test results.<sup>55</sup> While the reason behind this discrepancy remains unclear, the study suggests that despite its

imperfections, leveraging probabilistic recommendations from LLMs such as GPT-4 could enhance human diagnostic capabilities.<sup>55</sup> This collaborative approach, combining AI’s probabilistic, narrative, and heuristic diagnostic approaches, might contribute to improved diagnostic accuracy through collective intelligence.<sup>55</sup>

Overall, these tools not only offer a heightened level of accuracy they also prioritize user privacy and data security. Integrating these tools into research and healthcare systems enables early detection and better understanding of symptoms. It also contributes to well-being outcomes, especially for older individuals, when combined with a comprehensive support system. As technology continues to evolve, these tools are poised to play an increasingly vital role in enhancing healthcare and advancing diagnostic capabilities.

**Table 2. Tools Developed to Assist Researchers in the Use of Search Data**

| <b>Tool Name</b>                     | <b>Function</b>                                                                                                                                                                                                                                                                                                                                                                                            |
|--------------------------------------|------------------------------------------------------------------------------------------------------------------------------------------------------------------------------------------------------------------------------------------------------------------------------------------------------------------------------------------------------------------------------------------------------------|
| GTAP WEB APP                         | This web app allows participants to download their data without sharing personal Google account credentials. <sup>44</sup>                                                                                                                                                                                                                                                                                 |
| LIWC                                 | This is a text analysis software package that can differentiate linguistic attributes in search logs. <sup>26</sup> Previous researchers have performed psycholinguistic analysis on text data to uncover signals of abuse (emotional, sexual, or physical) and domestic violence using the LIWC. <sup>26</sup>                                                                                            |
| Google Natural Language AI (NLP API) | The Google NLP API assures removal of personally identifying information. <sup>53</sup> The API scans for personal identifiers such as names, addresses, and phone numbers that can potentially identify individual study participants, and this information is automatically removed from the search history data before it is transferred to the research team and saved as research data. <sup>53</sup> |
| CrowdTangle                          | This is a tool from Meta to help follow, analyze, and report what is happening across social media. <sup>16</sup> It is the most effective transparency tool in the history of social media. <sup>16</sup>                                                                                                                                                                                                 |
| Latent Dirichlet Allocation (LDA)    | LDA produces clusters of words that occur in the same context across Facebook posts,                                                                                                                                                                                                                                                                                                                       |

|                                                |                                                                                                                                                                                                                                                                                                                                                                                                                                              |
|------------------------------------------------|----------------------------------------------------------------------------------------------------------------------------------------------------------------------------------------------------------------------------------------------------------------------------------------------------------------------------------------------------------------------------------------------------------------------------------------------|
|                                                | yielding semantically coherent topics. <sup>16</sup> It is appropriate for the highly non-normal frequency distributions observed in language use. <sup>16</sup>                                                                                                                                                                                                                                                                             |
| Differential Language Analysis Toolkit (DLATK) | The DLATK determines the relative frequency with which users used words (unigrams) and two-word phrases (bigrams). <sup>54</sup> It can also retain variables and phrases. <sup>54</sup>                                                                                                                                                                                                                                                     |
| GPT-4 AI Chatbot GPT-4 (OpenAI)                | LLMs can convincingly solve difficult diagnostic cases, pass licensing examinations, and communicate empathetically with patients, suggesting that they have an emergent understanding of clinical reasoning. <sup>55</sup> This diagnostic study assessed the ability of the AI chatbot GPT-4 (OpenAI) to appropriately perform probabilistic reasoning by comparing its performance with a large survey of human clinicians. <sup>55</sup> |

## Challenges and Limitations

Despite its benefits, the use of internet search data to facilitate medical diagnosis faces challenges, including bias, data privacy, misinformation, and others. The ethical use of patient data is crucial. Wachter and Mittelstadt’s 2019 article “A Right to Reasonable Interferences: Rethinking Data Protection Law in the Age of Big Data and AI” delved into the ethical dilemmas surrounding the use of big data in healthcare.<sup>56</sup> The authors emphasized the need to balance patient privacy with the benefits of big data analytics.<sup>46</sup> The article also discussed the importance of consent and transparency in the collection and use of patient data, highlighting potential biases and inequalities that could arise from mismanaged data practices.<sup>56</sup> Yom-Tov and Cherlow further emphasize the need for careful consideration of the ethical implications and suggest solutions that balance the benefits of online screening services with the challenges they pose.<sup>57</sup>

In our exploration of the field of information sciences concerning internet search data, a notable challenge emerged: there is a distinct lack of infrastructure for constructing a robust analytic approach to leverage these data in medical and health services research. Our analysis led us to investigate alternative open data research organizational models, among which we discovered the pioneering work of Professor Julia Lane. In her book *Democratizing Our Data: A Manifesto*, Lane introduces an organizational model that promises to revolutionize data accessibility and usefulness.<sup>58</sup> Within this context, the Institute for Research on Innovation and Science (IRIS) stands out prominently with its groundbreaking contribution, the UMETRICS dataset.<sup>58</sup> UMETRICS constitutes a burgeoning research asset, harnessing administrative data—that is,



information collected primarily for administrative purposes, such as billing and record-keeping, that is repurposed for research to analyze healthcare utilization, outcomes, and patterns—from 30 prominent universities that collectively contribute over one-third of federal R&D spending in academia.<sup>58</sup> This innovative dataset signifies a transformative shift in data practices, fundamentally reshaping data collection methodologies, fortifying privacy safeguards, and fostering the generation of new products.<sup>58</sup> Notably, IRIS pioneered the inception of “big data” social science research infrastructures.<sup>58</sup> Central to their mission was grappling with the challenge of comprehending the impact of research funding on scientific and economic activities—a formidable task given the inherent complexities of measuring science’s impact.<sup>58</sup> IRIS responded by spearheading the construction of an entire infrastructure aimed at tracing the effects of research funding on individuals and interconnected networks.<sup>58</sup> They developed a highly adaptable data infrastructure which is composed of a decentralized network of federal agencies responsible for collecting, processing, analyzing, and disseminating data on various aspects of the country, including the economy, natural resources, and infrastructure, that caters directly to the research university community and provides impactful methods to assess the scientific and economic implications of their research pursuits, thus surpassing the federal statistical system.<sup>58</sup> Critical to IRIS’s approach was the establishment of a data infrastructure firmly rooted in transparent governance, robust privacy protocols, and effective confidentiality protections.<sup>58</sup> This dedication to principled practices was further buttressed by a sustainable business model reliant on contributions from data providers and sponsored projects.<sup>58</sup> The comprehensive approach adopted by IRIS lays a significant foundation for transformative data activities in the realm of social media.<sup>58</sup> This framework not only promises accessible and purposeful data utilization but also offers a fundamental organizational framework.<sup>58</sup>

Leveraging the work of organizations such as IRIS may unify researchers’ approaches in governance, transparency, data sharing, and related core aspects essential for utilizing internet search data effectively. Integrating these insights into our analysis could illuminate potential pathways to address critical gaps in this field. There is a need to establish robust infrastructures that equip researchers with the necessary tools and resources to delve into this type of research at scale. Assessing the true utility of internet search data in medical diagnosis requires comprehensive frameworks that facilitate large-scale analysis while ensuring data privacy and integrity. Moreover, should research demonstrate the valuable application of these findings, such infrastructures will play a pivotal role in translating discoveries into actionable insights for clinical practice and healthcare policy.

## **Implications for Healthcare Practice and Policy**

The integration of internet search data with health research datasets could hold profound implications for healthcare practice and policy, necessitating careful consideration of both the technical and ethical dimensions. The use of internet search data in healthcare research poses unique challenges that go beyond the scope of traditional regulatory frameworks such as HIPAA.

While HIPAA governs the use and disclosure of protected health information held by covered entities, it may not fully address the intricacies of internet search data, which often contains a wealth of information about individuals' health behaviors, concerns, and potentially sensitive details not captured by conventional health records.

In the context of policy implications, IRBs play a crucial role in ensuring ethical research practices and safeguarding participants' welfare. For research involving internet search data, IRBs face the challenge of navigating the nuanced landscape of privacy, consent, and potential risks. Unlike conventional clinical data, internet search data may not fall under the strict purview of HIPAA, making it essential for IRBs to establish clear guidelines tailored to the nature of this data.

## **Future Research Directions**

The findings of this literature review underscore the need for concerted efforts in stimulating future research to fully explore and comprehend the potential clinical utility of integrating internet search data with health research datasets. While our review did not distinctly identify a clear clinical utility, it did reveal promising dimensions in behavioral health, early rare disease detection, and cancer diagnoses. Notably, the limited amount of research in this domain since the seminal work of White and Horvitz<sup>59,60</sup> in 2014 and the relative scarcity of research suggest potential barriers related to researchers' familiarity with the data, technical complexities in mining the data, or other yet-to-be identified obstacles.<sup>61</sup>

To address these gaps and challenges, we propose a multifaceted approach in 4 key areas:

First, there is an urgent need to assess the value and utility of internet search and activity datasets in conjunction with health research datasets, including clinical records. This evaluation should explore how such integration can enhance the diagnostic process, contribute to early disease detection, provide personalized health insights, inform data-driven decision-making, and improve overall patient experiences.

Second, future research endeavors should focus on mental health, autism, ADHD, and chronic or rare diseases. Tailoring projects to address the unique diagnostic and treatment challenges within these domains will be important and may involve the creation of customized algorithms and tools that cater specifically to the needs of these patient populations, acknowledging the nuanced nature of their health conditions.

Third, the introduction of innovative analytics, including advanced machine learning and AI models, should be a priority. These sophisticated techniques can uncover hidden patterns and trends within the integrated datasets, offering a new frontier in diagnostic accuracy. Developing predictive models has the potential to revolutionize healthcare delivery by providing more precise insights into patient conditions and optimizing treatment plans. Furthermore, the advancement of infrastructure platforms that allow for the potential to aggregate search data with

other types of online data (e.g., social media, generative AI data) and clinical data would not only allow for this research to be conducted at scale but would also allow for the introduction of the kind of innovative analytics described above.

Fourth, enhancing patient engagement and consent models is paramount. Research should focus on developing innovative strategies that streamline and modernize the consent process, prioritizing transparency, trust, and patient comfort with the use of their data. Actively involving patients in shaping research practices ensures ethical, patient-centered healthcare research. This approach reduces administrative burdens and promotes accessibility, efficiency, and the ethical conduct of research practices.

In conclusion, this comprehensive effort aims to propel research in this promising field, overcoming current limitations and paving the way for transformative applications of internet search and activity data in healthcare diagnostics. Innovations, such as the development of reusable platforms for consenting and data collection, may improve the engagement of researchers and patients in this research. Implementing standardized platforms that streamline the consent process and facilitate data collection can significantly enhance research efficiency and scalability. These platforms should incorporate user-friendly interfaces, clear consent language, and robust data security measures to ensure compliance with privacy regulations and promote patient trust. By establishing reusable frameworks, researchers can expedite the research process, minimize administrative burdens, and foster collaboration across studies, ultimately advancing our understanding of the clinical utility of internet search data in medical diagnosis.

Respecting patient privacy and obtaining informed consent are foundational principles in healthcare research. Because the integration of internet search data involves potentially sensitive information, careful attention must be paid to ethical considerations. Transparent and user-friendly consent models should be developed to ensure that patients understand who will have access to their data and how their data will be used. Innovative approaches to patient engagement should prioritize educating individuals about the benefits and risks of contributing their internet search data to research initiatives. Additionally, robust security measures and compliance with privacy regulations are imperative to protect patient confidentiality. Policymakers play a pivotal role in establishing clear guidelines and regulations that balance the potential benefits of research using internet search data and patients' medical data with the imperative to uphold patient rights and privacy. Striking the right balance between facilitating research advancements and safeguarding patient interests is critical for the responsible and ethical use of internet search data in healthcare practice and policy.

## **Conclusion**

In today's modern healthcare delivery system, many patients remain disadvantaged by the lack of access to timely and accurate diagnosis of disease and health conditions. As a result, the benefits of early detection and treatment are missed, leading to suboptimal outcomes, health

disparities, and ultimately, changes in national economic productivity. Meanwhile, remarkable advances in technical engineering, computing power, social science, data analytics, and information science are leading to unimaginable insights for public health and clinical medicine. Recently, the confluence of these forces in the use of LLMs and generative AI has captured the imagination of the public and health professionals alike.

The initial research studies have illuminated a spectrum of approaches encompassing study design, technical innovations, and data management methodologies tailored to explore the potential utility and opportunities in leveraging an individual's internet search data alongside clinical health data to improve early diagnosis of medical conditions. Further research methods will be needed to harness the utility of these data in dimensions of case-control studies or small cohorts with detailed associations of disease symptoms and outcomes. Additional studies are needed to validate assumptions made from studies that rely only on search history. Further implementation studies are needed in real-world settings to address the clinical utility of these strategies. Such matters of concern involve the population health costs associated with diagnostic assessments, particularly if the conditions being correlated are of low frequency (or have high false-positive rates) and include substantial medical risk. Today, there is no framework for the clinical adoption of internet search queries in the clinical assessment of patients. For example, how should conditions for a clinical work-up associated with chronic disease concerns be distinguished from those of a rare disease in the use of internet search query applications?

People worldwide use internet search engines and browsers extensively to find health-related information for symptom understanding, self-diagnosis, and self-treatment. The volume of health-related internet searches is immense. An individual's internet search history is a potentially valuable data source that offers insights into their physical and mental diagnostic journey, leading up to their first healthcare encounter that results in a diagnosis. Such data have enabled researchers to track symptom evolution and even predict medical conditions. Additionally, linking internet search and activity data with healthcare utilization information can unveil disparities in healthcare outcomes based on factors such as insurance type, race, and education. Empowering patients to understand the significance of these data and their utility is essential in order to enhance their involvement in owning their data and health, thereby driving the potential for improved diagnosis. Nevertheless, despite promising research on this subject, significant epidemiological questions, privacy and consent concerns, questions around technical infrastructure, and the need for further validation and correlation with diagnostic outcomes remain pivotal in advancing this research for the betterment of healthcare.

The interrogation of internet search data is in its infancy. However, initial studies have identified the promise of using internet search data for population- and personal-level health benefits, including assisting in the diagnosis of diseases and conditions. While the clinical utility of enabling a healthcare professional to apply powerful analytic engines to a specific diagnosis has yet to be attained, research into achieving this goal is accelerating rapidly. This analysis points to the need for strategic and tactical measures to be undertaken collectively by health services

researchers, technology engineers, policymakers, and regulators to advance this research opportunity for the future and to ensure that the social good of such practices is optimized and that harm and misuse of information are avoided.

The Gordon and Betty Moore Foundation’s Diagnostic Excellence Initiative is a step toward a future in which healthcare is more accessible and patient-centric and is driven by IT and data. The field continues to evolve, promising a healthier, more informed society.

## **Acknowledgments**

This project was directed by AcademyHealth with funding from the Gordon and Betty Moore Foundation’s Diagnostic Excellence Initiative.

## **Authors**

Gregory J Downing, DO, PhD, Lucas M Tramontozzi, MPH, Jackson Garcia, Emma Villanueva

## **Reviewers**

Henry A. Kautz, PhD, Karen J Maschke, PhD, Elad Yom-Tov, PhD, MA, Chris Riley, JD, PhD, Matthew J Thompson, DPhil, MPH, MBChB

## References

1. Research on pre-hospital diagnostic delay. AcademyHealth. Accessed December 18, 2023. <https://academyhealth.org/about/programs/research-pre-hospital-diagnostic-delay>.
2. Eysenbach G. A framework for evaluating e-health: systematic review of studies assessing the quality of health information and services for patients on the Internet. *J Med Internet Res*. 2000;2(Suppl 2):e13-17. doi:10.2196/jmir.2.suppl2.e13
3. Bianchi T. Global market share of leading desktop search engines 2015-2023. Statista website. <https://www.statista.com/statistics/216573/worldwide-market-share-of-search-engines/>. Published September 20, 2023. Accessed December 4, 2024.
4. Farr C. Your Google searches can be used to predict when you're about to go to the emergency room, researchers find. CNBC website. <https://www.cnbc.com/2019/02/22/google-searches-could-be-used-to-predict-emergency-room-visits.html>. Published February 22, 2019. Accessed January 9, 2024.
5. Healthcare marketing SEO during the pandemic and beyond. Milestoneinternet.com. <https://blog.milestoneinternet.com/seo/healthcare-seo-during-the-pandemic-and-beyond/>. Published July 23, 2020. Accessed January 2, 2024.
6. Hochberg I, Allon R, Yom-Tov E. Assessment of the frequency of online searches for symptoms before diagnosis: analysis of archival data. *J Med Internet Res*. 2020;22(3):e15065. Published March 6, 2020. doi:10.2196/15065
7. Ahmed A. Google is still not the all-knowing, almighty search engine as 15 percent of queries are 'never seen before' by tech giant. Digital Information World website. <https://www.digitalinformationworld.com/2020/08/google-is-still-not-the-all-knowing-almighty-search-engine-as-15-percent-of-queries-are-never-seen-before-by-tech-giant.html>. Published August 31, 2020. Accessed January 9, 2024.
8. Tang H, Ng JHK. Googling for a diagnosis—use of Google as a diagnostic aid: internet based study. *BMJ*. 2006;333(7579):1143-1145. doi:10.1136/bmj.39003.640567.AE
9. McDuff D, Schaekermann M, Tu T, et al. Towards accurate differential diagnosis with large language models. arXiv.org. Published online 2023. doi:10.48550/arxiv.2312.00164
10. Ayers JW, Chu B, Zhu Z, et al. Spread of misinformation about face masks and COVID-19 by automated software on Facebook. *JAMA Intern Med*. 2021;181(9):1251-1253. doi:10.1001/jamainternmed.2021.2498
11. Chang S, Fournery A, Horvitz E. Accurate measures of vaccination and concerns of vaccine holdouts from web search logs. In epiDAMIK 2023: 6th epiDAMIK ACM SIGKDD International Workshop on Epidemiology meets Data Mining and Knowledge Discovery; August 7, 2023, Long Beach, CA, USA. <https://openreview.net/group?id=KDD.org/2023/Workshop/epiDAMIK>. Published July 3, 2023. Last modified July 28, 2023. Accessed January 9, 2024.

12. Diaz P, Reddy P, Ramasahayam R, Kuchakulla M, Ramasamy R. COVID-19 vaccine hesitancy linked to increased internet search queries for side effects on fertility potential in the initial rollout phase following Emergency Use Authorization. *Andrologia*. 2021;53(9):e14156. Published June 28, 2021. <https://doi.org/10.1111/and.14156>
13. Larson HJ, Broniatowski DA. Volatility of vaccine confidence. *Science*. 2021;371(6536):1289-1289. doi:10.1126/science.abi6488
14. Abroms LC, Koban D, Krishnan N, et al. Empathic engagement with the COVID-19 vaccine hesitant in private Facebook groups: a randomized trial. *Health Educ Behav*. 2023;0(0). doi:10.1177/10901981231188313
15. Gu J, Dor A, Li K, et al. The impact of Facebook’s vaccine misinformation policy on user endorsements of vaccine content: an interrupted time series analysis. *Vaccine*. 2022;40(14):2209-2214. <https://doi.org/10.1016/j.vaccine.2022.02.062>
16. Broniatowski DA, Dredze M, Ayers JW. “First do no harm”: effective communication about COVID-19 vaccines. *Am J Public Health*. 2021;111:1055-1057. <https://doi.org/10.2105/AJPH.2021.306288>
17. Gianfredi V, Provenzano S, Santangelo OE. What can internet users’ behaviours reveal about the mental health impacts of the COVID-19 pandemic? A systematic review. *Pub Health, Lond*. 2021;198:44-52. doi:10.1016/j.puhe.2021.06.024
18. Phillips CA, Barz Leahy A, Li Y, Schapira MM, Bailey LC, Merchant RM. Relationship between state-level Google online search volume and cancer incidence in the United States: retrospective study. *J Med Internet Res*. 2018;20(1):e6. Published 2018 Jan 8. doi:10.2196/jmir.8870
19. Ginsberg J, Mohebbi MH, Patel RS, Brammer L, Smolinski MS, Brilliant L. Detecting influenza epidemics using search engine query data. *Nature*. 2009;457(7232):1012-1014. doi:10.1038/nature07634
20. Office for Human Research Protections, U.S. Department of Health and Human Services. 2018 Requirements (2018 Common Rule). <https://www.hhs.gov/ohrp/regulations-and-policy/regulations/45-cfr-46/revised-common-rule-regulatory-text/index.html>. Accessed January 9, 2024.
21. Paparrizos J, White RW, Horvitz E. Screening for Pancreatic Adenocarcinoma Using Signals From Web Search Logs: Feasibility Study and Results. *J Oncol Pract*. 2016;12(8):737-744. doi:10.1200/JOP.2015.010504
22. Kirschenbaum MA, Birnbaum ML, Rizvi A, Muscat W, Patel L, Kane JM. Google search activity in early psychosis: A qualitative analysis of internet search query content in first episode psychosis. *Early Interv Psychia*. 2020;14(5):606-612. doi:10.1111/eip.12886
23. Giat E, Yom-Tov E. Evidence from web-based dietary search patterns to the role of B12 deficiency in non-specific chronic pain: a large-scale observational study. *J Med Internet Res*. 2018;20(1):e4. Published January 5, 2018. doi:10.2196/jmir.8667

24. Shaklai S, Gilad-Bachrach R, Yom-Tov E, Stern N. Detecting impending stroke from cognitive traits evident in internet searches: analysis of archival data. *J Med Internet Res.* 2021;23(5):e27084. doi: [10.2196/27084](https://doi.org/10.2196/27084)
25. Asch JM, Asch DA, Klinger EV, et al. Google search histories of patients presenting to an emergency department: an observational study. *BMJ Open.* 2019;9:e024791. doi:10.1136/bmjopen-2018-024791
26. Zaman A, Kautz H, Silenzio V, Hoque ME, Nichols-Hadeed C, Cerulli C. Discovering intimate partner violence from web search history. *Smart Health.* 2021;19:100161. <https://doi.org/10.1016/j.smhl.2020.100161>
27. Youngmann B, Yom-Tov E. Intimate partner violence as reflected in Internet search data. *Soc Sci Comput Rev.* 2023;41(5):1546-1561. doi:10.1177/08944393221084074
28. Ofra Y, Paltiel O, Pelleg D, Rowe JM, Yom-Tov E. Patterns of information-seeking for cancer on the internet: an analysis of real world data. *PLoS One.* 2012;7(9):e45921. doi:10.1371/journal.pone.0045921
29. Soldaini L, Yom-Tov E. Inferring individual attributes from search engine queries and auxiliary information. In: arXiv.org. Cornell University Library, arXiv.org; 2016. doi:10.48550/arxiv.1610.08442
30. Yom-Tov E. Screening for cancer using a learning Internet advertising system. arXiv.org. Published online 2018. doi:10.48550/arxiv.1802.09352
31. Phillips CA, Hunt A, Salvesen-Quinn M, et al. Health-related Google searches performed by parents of pediatric oncology patients. *Pediatr Blood Cancer.* 2019; 66(8): e27795–n/a. <https://doi.org/10.1002/pbc.27795>
32. White RW, Horvitz E. Evaluation of the feasibility of screening patients for early signs of lung carcinoma in web search logs. *JAMA Oncol.* 2017;3(3):398-401. doi:10.1001/jamaoncol.2016.4911
33. Mueller J, Jay C, Harper S, Todd C. The role of web-based health information in help-seeking behavior prior to a diagnosis of lung cancer: a mixed-methods study. *J Med Internet Res.* 2017;19(6):e189. <https://doi.org/10.2196/jmir.6336>
34. Barcroft JF, Yom-Tov E, Lampos V, et al. Using online search activity for earlier detection of gynaecological malignancy. 2023. Preprint (Version 1) available at Research Square: <https://doi.org/10.21203/rs.3.rs-2765605/v1>. Posted April 23, 2023. Accessed January 9, 2024.
35. Soldaini L, Yates A, Yom-Tov E, Frieder O, Goharian N. Enhancing web search in the medical domain via query clarification. *Information retrieval (Boston).* 2016;19(1-2):149-173. doi:10.1007/s10791-015-9258-y
36. Chen G, Xie J, Zhang Y, et al. OC11.02: Identification of pathological types of adnexal masses from ultrasound images using deep learning models. *Ultrasound Obstet Gynecol.* 2022;60(S1):32-32. doi:10.1002/uog.25071



37. Nitzburg G, Weber I, Yom-Tov E. Internet searches for medical symptoms before seeking information on 12-Step addiction treatment programs: a web-search log analysis. *J Med Internet Res.* 2019;21(5):e10946-e10946. doi:10.2196/10946
38. Zhang B, Zaman A, Acharyya R, Hoque E, Silenzio V, Kautz H. Detecting individuals with depressive disorder from personal Google search and YouTube history logs. arXiv.org. Published online 2020. doi:10.48550/arxiv.2010.15670
39. Zaman A, Zhang B, Hoque E, Silenzio V, Kautz H. The relationship between deteriorating mental health conditions and longitudinal behavioral changes in Google and YouTube usages among college students in the United States during COVID-19: observational study. arXiv.org. *JMIR Ment Health* 2020;7(11):e24012 doi: 10.2196/24012
40. Zaman A, Zhang B, Silenzio V, Hoque E, Kautz H. Individual-level anxiety detection and prediction from longitudinal YouTube and Google search engagement logs. arXiv.org. Published online 2020. doi:10.48550/arxiv.2007.00613
41. Youngmann B., Yom-Tov E. Anxiety and information seeking: evidence from large-scale mouse tracking. *Proceedings of the 2018 World Wide Web Conference*. 2018;753–762. <https://doi.org/10.1177/08944393221084074>
42. Sadeh-Sharvit S, Fitzsimmons-Craft EE, Taylor CB, Yom-Tov E. Predicting eating disorders from Internet activity. *Int J Eat Disord*. 2020;53(9):1526-1533. doi:10.1002/eat.23338
43. Moon KC, Van Meter AR, Kirschenbaum MA, Ali A, Kane JM, Birnbaum ML. Internet search activity of young people with mood disorders who are hospitalized for suicidal thoughts and behaviors: qualitative study of Google search activity. *JMIR Ment Health*. 2021;8(10):e28262. Published Oct 22, 2021. doi:10.2196/28262
44. Areán PA, Pratap A, Hsin Honor, et al. Perceived utility and characterization of personal Google search histories to detect data patterns proximal to a suicide attempt in individuals who previously attempted suicide: pilot cohort study. *J Med Internet Res*. 2021;23(5):544-556. doi: 10.2196/27918
45. Aref-Adib G, O'Hanlon P, Fullarton K, et al. A qualitative study of online mental health information seeking behaviour by those with psychosis. *BMC Psychiatry*. 2016;16(1):232-232. doi:10.1186/s12888-016-0952-0
46. Birnbaum ML, Kulkarni P, Van Meter A, et al. Utilizing machine learning on internet search activity to support the diagnostic process and relapse detection in young individuals with early psychosis: feasibility study. *JMIR Ment Health*. 2020;7(9):e19348. doi: 10.2196/19348
47. Austin J, Hollingshead K, Kaye J. Internet searches and their relationship to cognitive function in older adults: cross-sectional analysis. *J Med Internet Res*. 2017;19(9):e307-e307. doi:10.2196/jmir.7671

48. Youngmann B, Allerhand L, Paltiel O, Yom-Tov E, Arkadir D. A machine learning algorithm successfully screens for Parkinson's in web users. *Ann Clin Transl Neurol*. 2019;6(12):2503-2509. doi:10.1002/acn3.50945
49. Yom-Tov E, Navar I, Fraenkel E, Berry JD. Identifying amyotrophic lateral sclerosis through interactions with an internet search engine. *Muscle Nerve*. 2024;69(1):40-47. doi:10.1002/mus.27991
50. Hochberg I, Daoud D, Shehadeh N, Yom-Tov E. Can internet search engine queries be used to diagnose diabetes? Analysis of archival search data. *Acta Diabetol*. 2019;56(10):1149-1154. doi:10.1007/s00592-019-01350-5
51. Lebowitz B, Yom-Tov E. Symptoms prompting interest in celiac disease and the gluten-free diet: analysis of internet search term data. *J Med Internet Res*. 2019;21(4):e13082-e13082. doi:10.2196/13082
52. Zaman A, Acharyya R, Kautz H, Silenzio V. Detecting low self-esteem in youths from web search data. *WWW '19: The World Wide Web Conference*. 2019;2270–2280. <https://doi.org/10.1145/3308558.3313557>
53. Zaman, Anis. “Combining Traditional and Non-Traditional Data Stream for Understanding Mental Health,” 2021. Dissertation.
54. Eichstaedt JC, Smith RJ, Merchant RM, et al. Facebook language predicts depression in medical records. *Proc Natl Acad Sci U S A*. 2018;115(44):11203-11208. doi:10.1073/pnas.1802331115
55. Rodman A, Buckley TA, Manrai AK, Morgan DJ. Artificial intelligence vs clinician performance in estimating probabilities of diagnoses before and after testing. *JAMA Netw Open*. 2023;6(12):e2347075. Published December 1, 2023. doi:10.1001/jamanetworkopen.2023.47075
56. Wachter S, Mittelstadt B. A right to reasonable interferences: re-thinking data protection law in the age of Big Data and AI. *Colum Bus L Rev*. Revised 2019;2. Available at SSRN: <https://ssrn.com/abstract=3248829>. Accessed January 8, 2024.
57. Yom-Tov E, Cherlow Y. Ethical challenges and opportunities associated with the ability to perform medical screening from interactions with search engines: viewpoint. *J Med Internet Res*. 2020;22(9):e21922-e21922. doi:10.2196/21922
58. Lane J. *Democratizing Our Data: A Manifesto*. The MIT Press; 2021.
59. White RW, Horvitz E. From health search to healthcare: explorations of intention and utilization via query logs and user surveys. *J Am Med Inform Assoc*. 2014;21(1):49-55. doi:10.1136/amiajnl-2012-001473
60. White R, Horvitz E. From web search to healthcare utilization: privacy-sensitive studies from mobile data. *J Am Med Inform Assoc*. 2013;20(1):61-68. doi:10.1136/amiajnl-2011-000765

61. Yom-Tov E, White RW, Horvitz E. Seeking insights about cycling mood disorders via anonymized search logs. *J Med Internet Res*. 2014;16(2):e65-e65. doi:10.2196/jmir.2664
62. Beam AL, Drazen JM, Kohane IS, Leong TY, Manrai AK, Rubin EJ. Artificial intelligence in medicine. *N Engl J Med*. 2023;388(13):1220-1221. doi:10.1056/NEJMe2206291
63. Majerowicz A, Tracy S. Telemedicine. Bridging gaps in healthcare delivery. *J AHIMA*. 2010;81(5):52-53. <https://pubmed.ncbi.nlm.nih.gov/20496638/> Accessed January 9, 2024.
64. Greenes RA. Informatics and a health care strategy for the future—general directions. *Stud Health Technol Inform*. 2009;149:21-28. doi:10.3233/978-1-60750-050-6-21
65. Strengers Y, Duque M, Mortimer M, et al. “Isn’t this marvelous”: supporting older adults’ wellbeing with smart home devices through curiosity, play and experimentation. In: Khot RA, Sweetser P, Obrist M, eds. *DIS 22, Proceedings of the 2022 ACM Designing Interactive Systems Conference*. Association for Computing Machinery (ACM). 2022;707-725. <https://doi.org/10.1145/3532106.3533502>

## Appendix 1: Search Term Results

| <b>Term</b>                                  | <b>PubMed Results</b> |
|----------------------------------------------|-----------------------|
| "internet search" AND diagnosis              | 443                   |
| "online search" AND diagnosis                | 41                    |
| "search engine" AND diagnosis                | 124                   |
| "web search" AND diagnosis                   | 13                    |
| "search behavior" AND diagnosis              | 9                     |
| (Google OR Bing) AND diagnosis               | 1,566                 |
| Takeout AND diagnosis                        | 4                     |
| "internet" AND "early diagnosis"             | 40                    |
| "internet search" AND disease detection      | 39                    |
| "online search" AND disease detection        | 4                     |
| "search engine" AND disease detection        | 18                    |
| "web search" AND disease detection           | 20                    |
| "search behavior" AND disease detection      | 7                     |
| (Google OR Bing) AND disease detection       | 580                   |
| Takeout AND disease detection                | 3                     |
| internet AND "disease detection"             | 111                   |
|                                              |                       |
| "internet search" AND disease identification | 19                    |
| "online search" AND disease identification   | 31                    |
| "search engine" AND disease identification   | 124                   |
| "web search" AND disease identification      | 10                    |
| "search behavior" AND disease identification | 1                     |
| (Google OR Bing) AND disease identification  | 1,194                 |
| Takeout AND disease identification           | 3                     |
|                                              |                       |
| "internet search" AND diagnostic accuracy    | 34                    |
| "online search" AND diagnostic accuracy      | 23                    |
| "search engine" AND diagnostic accuracy      | 140                   |
| "web search" AND diagnostic accuracy         | 15                    |
| "search behavior" AND diagnostic accuracy    | 12                    |
| (Google OR Bing) AND diagnostic accuracy     | 1,799                 |
| Takeout AND diagnostic accuracy              | 0                     |

## Appendix 2: Literature Matrix

| Title                                                                                                                                                                                                                    | Brief Synopsis                                                                                                                                                                                                                                                                                                                                                                                                                                                                                                                                                                                                                                                                                                                                                                                                                                        |
|--------------------------------------------------------------------------------------------------------------------------------------------------------------------------------------------------------------------------|-------------------------------------------------------------------------------------------------------------------------------------------------------------------------------------------------------------------------------------------------------------------------------------------------------------------------------------------------------------------------------------------------------------------------------------------------------------------------------------------------------------------------------------------------------------------------------------------------------------------------------------------------------------------------------------------------------------------------------------------------------------------------------------------------------------------------------------------------------|
| <p><b>A machine learning algorithm successfully screens for Parkinson's in web users</b></p> <p><a href="https://doi.org/10.1002/acn3.50945">https://doi.org/10.1002/acn3.50945</a></p>                                  | <p>The study aimed to create and assess a novel web-based classifier for Parkinson's disease screening using search engine user data. Applying the classifier to a large cohort identified 1.2% of users over 40 years old as screening positive for Parkinson's, with higher rates in at-risk groups. Longitudinal analysis revealed faster disease progression in individuals classified as positive, highlighting the potential of web-based screening but also raising ethical concerns.</p>                                                                                                                                                                                                                                                                                                                                                      |
| <p><b>A qualitative study of online mental health information seeking behaviour by those with psychosis</b></p> <p><a href="https://doi.org/10.1186/s12888-016-0952-0">https://doi.org/10.1186/s12888-016-0952-0</a></p> | <p>This study delved into the patterns and consequences of online mental health information-seeking behavior among individuals with psychosis and assesses the acceptability of a mobile mental health application (app). Individuals with psychosis commonly seek mental health information online, which proves beneficial when shared collaboratively with clinicians. However, when not shared, it can impact healthcare decisions. The research underscores the necessity for a collaborative approach to online health information seeking, with mental health clinicians encouraging patients to discuss online findings as part of shared decision-making. Findings suggest that individuals with psychosis lead active digital lives, indicating potential positive reception for the introduction of a mental health app into services.</p> |
| <p><b>Anxiety and information seeking: evidence from large-scale mouse tracking</b></p> <p><a href="https://doi.org/10.1145/3178876.3186156">https://doi.org/10.1145/3178876.3186156</a></p>                             | <p>The study revealed that individuals exhibit distinct information-seeking behaviors on search engines depending on their level of anxiety and that this is particularly evident in searches for medical symptoms with potentially life-threatening implications. By analyzing mouse tracking data and other user interactions, a model is developed to predict user anxiety levels, achieving significant correlation with the severity of symptoms searched. The findings underscore the importance of incorporating user anxiety information to accurately measure search engine performance. This is particularly crucial in delivering critical medical information and suicide prevention resources effectively.</p>                                                                                                                           |
| <p><b>Assessment of the frequency of online searches for symptoms before diagnosis: analysis of archival data</b></p>                                                                                                    | <p>This study examined the percentage of people who search for symptoms (on Bing) before they are diagnosed with conditions that have clear physical symptoms. The study found a large variability in the percentage of people who query the internet for their symptoms before a formal medical diagnosis is made.</p>                                                                                                                                                                                                                                                                                                                                                                                                                                                                                                                               |

| Title                                                                                                                                                                                                                                                                                                                                                          | Brief Synopsis                                                                                                                                                                                                                                                                                                                                                                                                                                                                                                                                                                                                                                                                                                                                             |
|----------------------------------------------------------------------------------------------------------------------------------------------------------------------------------------------------------------------------------------------------------------------------------------------------------------------------------------------------------------|------------------------------------------------------------------------------------------------------------------------------------------------------------------------------------------------------------------------------------------------------------------------------------------------------------------------------------------------------------------------------------------------------------------------------------------------------------------------------------------------------------------------------------------------------------------------------------------------------------------------------------------------------------------------------------------------------------------------------------------------------------|
| <a href="https://doi.org/10.2196/15065">https://doi.org/10.2196/15065</a>                                                                                                                                                                                                                                                                                      |                                                                                                                                                                                                                                                                                                                                                                                                                                                                                                                                                                                                                                                                                                                                                            |
| <p><b>Can internet search engine queries be used to diagnose diabetes? Analysis of archival search data</b></p> <p><a href="https://doi.org/10.1007/s00592-019-01350-5">https://doi.org/10.1007/s00592-019-01350-5</a></p>                                                                                                                                     | <p>Some undiagnosed diabetes patients can be detected accurately according to their symptom queries using a search engine. Such earlier diagnosis, especially in cases of type 1 diabetes, could be clinically meaningful. Search engines' ability to serve as a population-wide screening tool could be improved using additional data provided by users.</p>                                                                                                                                                                                                                                                                                                                                                                                             |
| <p><b>Combining Traditional and Non-Traditional Data Stream for Understanding Mental Health</b></p> <p><a href="https://www.proquest.com/openview/53fa9b9af362636fbfe7dc06abf03ac0/1?pq-origsite=gscholar&amp;cbl=18750&amp;diss=y">https://www.proquest.com/openview/53fa9b9af362636fbfe7dc06abf03ac0/1?pq-origsite=gscholar&amp;cbl=18750&amp;diss=y</a></p> | <p>This dissertation explored daily online behaviors via Google Search and YouTube platforms to create predictive models for various mental health conditions and introduced a cloud-based framework merging verified mental health indicators with daily online activities, enabling model construction for diverse mental health issues. During a 2-month study involving a college population, Google search logs revealed strong signals identifying individuals with low self-esteem. This mental health assessment framework is cost-effective, time-saving, and scalable, potentially applicable in real-world clinical settings. It enables healthcare providers to non-invasively understand patients' anxiety disorders at any given moment.</p> |
| <p><b>Detecting impending stroke from cognitive traits evident in internet searches: analysis of archival data</b></p> <p><a href="https://www.jmir.org/2021/5/e27084">https://www.jmir.org/2021/5/e27084</a></p>                                                                                                                                              | <p>The research suggested that employing algorithms utilizing online search queries could potentially identify populations at risk of stroke and predict near stroke events among those at high risk. Once it undergoes clinical validation, this algorithm holds the promise of facilitating swift preventive measures. Notably, it can be applied cost-effectively, consistently, and across a broad spectrum, with the intention of mitigating stroke events.</p>                                                                                                                                                                                                                                                                                       |
| <p><b>Detecting individuals with depressive disorder from personal Google Search and YouTube history logs</b></p> <p><a href="https://doi.org/10.48550/arXiv.2010.15670">https://doi.org/10.48550/arXiv.2010.15670</a></p>                                                                                                                                     | <p>This study proposed a personalized framework utilizing Google Search and YouTube engagement logs to detect individuals with depressive disorder, offering a more accessible and timely screening method compared to traditional in-person interviews.</p>                                                                                                                                                                                                                                                                                                                                                                                                                                                                                               |
| <p><b>Detecting low self-esteem in youths from web search data</b></p> <p><a href="https://doi.org/10.1145/3308558.3313557">https://doi.org/10.1145/3308558.3313557</a></p>                                                                                                                                                                                    | <p>This study addressed the void in examining indicators of low self-esteem, a condition intricately linked to a cycle involving depression and anxiety, at an individual level through the analysis of Google search history data. The research focuses on college students, a demographic susceptible to experiencing depression, anxiety, and low self-</p>                                                                                                                                                                                                                                                                                                                                                                                             |

| Title                                                                                                                                                                                   | Brief Synopsis                                                                                                                                                                                                                                                                                                                                                                                                                                                                                                                                                                                                                                                                                                                                                                                                                                                                                                                      |
|-----------------------------------------------------------------------------------------------------------------------------------------------------------------------------------------|-------------------------------------------------------------------------------------------------------------------------------------------------------------------------------------------------------------------------------------------------------------------------------------------------------------------------------------------------------------------------------------------------------------------------------------------------------------------------------------------------------------------------------------------------------------------------------------------------------------------------------------------------------------------------------------------------------------------------------------------------------------------------------------------------------------------------------------------------------------------------------------------------------------------------------------|
|                                                                                                                                                                                         | <p>esteem. They are asked to complete a mental health assessment survey and to provide access to their individual search history. Textual analysis of the search logs reveals prominent patterns capable of identifying individuals currently experiencing low self-esteem. Notably, participants with low self-esteem display fewer searches related to family, friends, and financial aspects. Furthermore, observable differences in the distribution of search categories over time distinguish them from individuals exhibiting moderate to high self-esteem. Leveraging these distinctive markers, the study developed a probabilistic classifier capable of detecting low self-esteem conditions based on search history, achieving an average F1 score of 0.86.</p>                                                                                                                                                         |
| <p><b>Discovering intimate partner violence from web search history</b><br/> <a href="https://doi.org/10.1016/j.smhl.2020.100161">https://doi.org/10.1016/j.smhl.2020.100161</a></p>    | <p>This paper proposed an adaptable, lightweight, and widely applicable screening method, validated through authentic data obtained from self-assessment surveys. This technique aims to identify potential indicators of intimate partner violence (IPV) by examining individual Google search histories. Preliminary analysis reveals discernible temporal, textual, and contextual differences in search behaviors between individuals who have or have not encountered IPV. Leveraging these distinctive patterns, a model capable of identifying violence within intimate relationships was constructed, achieving an F1 score of 0.80. Although these findings are preliminary, it is anticipated that this research will stimulate the AI community to address this critical public health issue. Additionally, this study illustrates a clear schematic depicting the processes of consent, data download, and linkage.</p> |
| <p><b>Enhancing web search in the medical domain via query clarification</b><br/> <a href="https://doi.org/10.1007/s10791-015-9258-y">https://doi.org/10.1007/s10791-015-9258-y</a></p> | <p>This study explored the effectiveness of bridging the gap between layperson and expert medical vocabularies through query clarification, aiming to assist users in finding authoritative and relevant medical information online. Through task-based retrieval studies and the implementation of a supervised classifier to select appropriate synonym mappings, the proposed system demonstrated improved user preference and accuracy in answering medical questions, with up to a 7% increase in correct answers. Additionally, the introduction of the classifier further enhanced the system's performance, resulting in a 12% increase in the fraction of correct answers.</p>                                                                                                                                                                                                                                             |
| <p><b>Ethical challenges and opportunities associated with the ability to perform medical screening from interactions with search engines: viewpoint</b></p>                            | <p>The study explored the potential of utilizing search engine logs for screening various medical conditions, offering opportunities for earlier diagnosis and equitable healthcare access but raising ethical concerns regarding privacy and autonomy. It discusses different approaches for providing screening information, from displaying</p>                                                                                                                                                                                                                                                                                                                                                                                                                                                                                                                                                                                  |

| Title                                                                                                                                                                                                                                         | Brief Synopsis                                                                                                                                                                                                                                                                                                                                                                                                                                                                                                                                                                                                                                           |
|-----------------------------------------------------------------------------------------------------------------------------------------------------------------------------------------------------------------------------------------------|----------------------------------------------------------------------------------------------------------------------------------------------------------------------------------------------------------------------------------------------------------------------------------------------------------------------------------------------------------------------------------------------------------------------------------------------------------------------------------------------------------------------------------------------------------------------------------------------------------------------------------------------------------|
| <a href="https://doi.org/10.2196/21922">https://doi.org/10.2196/21922</a>                                                                                                                                                                     | <p>notices to modifying search results and using advertisements, each with its advantages and disadvantages in terms of privacy, autonomy, and effectiveness. The study emphasizes the need for careful consideration of the ethical implications and suggests solutions that balance the benefits of online screening services with the challenges they pose.</p>                                                                                                                                                                                                                                                                                       |
| <p><b>Evaluation of the feasibility of screening patients for early signs of lung carcinoma in web search logs</b></p> <a href="https://doi.org/10.1001/jamaoncol.2016.4911">https://doi.org/10.1001/jamaoncol.2016.4911</a>                  | <p>A statistical classifier accurately identified web searchers who later input queries that provided evidence of a recent clinical diagnosis of lung carcinoma. The methods can help identify people at highest risk up to a year in advance of the inferred diagnosis time and identify new risk factors (e.g., house, age, air travel patterns) expressed as evidence in people's search activity and geographic location.</p>                                                                                                                                                                                                                        |
| <p><b>Evidence from web-based dietary search patterns to the role of B12 deficiency in non-specific chronic pain: a large-scale observational study</b></p> <a href="https://doi.org/10.2196/jmir.8667">https://doi.org/10.2196/jmir.8667</a> | <p>Food-related search patterns were highly correlated with known consumption and food-related searches (<math>\rho=.69</math>). Awareness of B12 deficiency was associated with a higher consumption of B12-rich foods and with queries for B12 supplements. Searches for terms related to neurological disorders were correlated with searches for B12-poor foods, in contrast with control terms. Popular medicines, those having fewer indications, and those that are predominantly used to treat pain were more strongly correlated with the ability to predict neuropathic pain queries using the B12 contents of food.</p>                       |
| <p><b>From health search to healthcare: explorations of intention and utilization via query logs and user surveys</b></p> <a href="https://doi.org/10.1136/amiajnl-2012-001473">https://doi.org/10.1136/amiajnl-2012-001473</a>               | <p>This study aimed to understand the relationship between online health-seeking behaviors and in-world healthcare utilization (HU) by analyzing data from online searches and surveys. By examining search logs and survey responses, the study provides insights into how users transition from online health information seeking to utilizing professional healthcare services. Results suggest a strong correlation between search behavior and healthcare utilization, offering the potential for inferring HU from long-term search patterns without tracking physical location, which could enhance models of user interests and preferences.</p> |
| <p><b>From web search to healthcare utilization: privacy-sensitive studies from mobile data</b></p> <a href="https://doi.org/10.1136/amiajnl-2011-000765">https://doi.org/10.1136/amiajnl-2011-000765</a>                                     | <p>Aiming to understand the relationship between health information-seeking behavior and engagement with healthcare professionals, this study conducted a privacy-conscious analysis of geo-tagged data from mobile devices. By analyzing anonymized logs of mobile interactions focusing on search queries and distances to medical care centers, the study investigated the sequence of health-related searches leading to</p>                                                                                                                                                                                                                         |



| Title                                                                                                                                                                                                                        | Brief Synopsis                                                                                                                                                                                                                                                                                                                                                                                                                                                                                                                                                                                                                                                                                                                                                                                                                                                                                |
|------------------------------------------------------------------------------------------------------------------------------------------------------------------------------------------------------------------------------|-----------------------------------------------------------------------------------------------------------------------------------------------------------------------------------------------------------------------------------------------------------------------------------------------------------------------------------------------------------------------------------------------------------------------------------------------------------------------------------------------------------------------------------------------------------------------------------------------------------------------------------------------------------------------------------------------------------------------------------------------------------------------------------------------------------------------------------------------------------------------------------------------|
|                                                                                                                                                                                                                              | <p>observed healthcare utilization indicators. Results revealed that the duration between symptom searches and evidence of healthcare utilization varies depending on symptom severity. Statistical models were developed to predict forthcoming healthcare utilization that achieved predictive accuracies ranging from 65% to 90%. The study emphasizes the importance of privacy-sensitive analysis in generating insights into health information seeking and healthcare engagement, highlighting the potential of large-scale mobile device studies in understanding individuals' pathways to professional medical care.</p>                                                                                                                                                                                                                                                             |
| <p><b>Google search activity in early psychosis: a qualitative analysis of internet search query content in first episode psychosis</b></p> <p><a href="https://doi.org/10.2196/19348">https://doi.org/10.2196/19348</a></p> | <p>The study examined the Google search histories of people experiencing their initial episode of psychosis before their initial hospital admission to uncover recurring topics and subjects they were exploring during the onset of their illness. It seems that individuals in the early stages of psychosis are turning to the internet to seek information about their initial symptoms and encounters before seeking psychiatric assistance. Enhancing our comprehension of how individuals in the early phases of psychosis search online for information about their experiences could assist mental health professionals in customizing online resources. This customization could enhance access to care and potentially decrease the duration between the onset of symptoms and the initiation of appropriate treatment for psychosis.</p>                                          |
| <p><b>Google search histories of patients presenting to an emergency department: an observational study</b></p> <p><a href="https://doi.org/10.1136/bmjopen-2018-024791">https://doi.org/10.1136/bmjopen-2018-024791</a></p> | <p>The aim of the study was to assess patients' readiness to share and connect their previous Google search records with information from their electronic medical records (EMRs), and to investigate correlations between search histories and clinical conditions. Out of all searches made within 7 days before an emergency department (ED) visit, 5% were related to health. Among the participants who utilized Google in the week leading up to their visit to the ED, 53% sought information directly linked to their primary health concern. The fluctuations in both the quantity and substance of search activity before an ED visit indicate that there are possibilities to predict and enhance healthcare utilization before such visits occur. Also, patients showed a willingness to grant researchers simultaneous access to their Google search histories and EMR data.</p> |
| <p><b>Googling for a diagnosis—use of Google as a diagnostic aid: internet based study</b></p>                                                                                                                               | <p>Google searches revealed the correct diagnosis in 15 (58%, 95% confidence interval 38% to 77%) cases. As internet access becomes more readily available in outpatient</p>                                                                                                                                                                                                                                                                                                                                                                                                                                                                                                                                                                                                                                                                                                                  |

| Title                                                                                                                                                                                                          | Brief Synopsis                                                                                                                                                                                                                                                                                                                                                                                                                                                                                                                                                                                                                                                                                                                                                                                                                                                                       |
|----------------------------------------------------------------------------------------------------------------------------------------------------------------------------------------------------------------|--------------------------------------------------------------------------------------------------------------------------------------------------------------------------------------------------------------------------------------------------------------------------------------------------------------------------------------------------------------------------------------------------------------------------------------------------------------------------------------------------------------------------------------------------------------------------------------------------------------------------------------------------------------------------------------------------------------------------------------------------------------------------------------------------------------------------------------------------------------------------------------|
| <a href="https://doi.org/10.1136/bmj.39003.640567.ae">https://doi.org/10.1136/bmj.39003.640567.ae</a>                                                                                                          | <p>clinics and hospital wards, the web is rapidly becoming an important clinical tool for doctors. The use of web-based searching may help doctors diagnose difficult cases.</p>                                                                                                                                                                                                                                                                                                                                                                                                                                                                                                                                                                                                                                                                                                     |
| <p><b>Health-related Google searches performed by parents of pediatric oncology patients</b></p> <p><a href="https://doi.org/10.1002/pbc.27795">https://doi.org/10.1002/pbc.27795</a></p>                      | <p>The content found in Google searches can provide valuable insight into the concerns of parents with children diagnosed with cancer. Analyzing this content could guide us toward more inclusive strategies for educating and supporting families. The study's goal was to pinpoint the priorities and areas where parents lacked information before and after the diagnosis. Searches related to health surged in the months leading up to the child's cancer diagnosis, predominantly focusing on symptoms and logistical information. Following the cancer diagnosis, health-related searches reached their peak after about a month, and these searches included general health inquiries alongside specific cancer-related searches.</p>                                                                                                                                      |
| <p><b>Identification of pathological types of adnexal masses from ultrasound images using deep learning model</b></p> <p><a href="https://doi.org/10.1002/uog.25071">https://doi.org/10.1002/uog.25071</a></p> | <p>This research assessed deep-learning models to distinguish between benign, malignant, and borderline adnexal masses. Additionally, the study aimed to classify 15 pathological types based on ultrasound images. This ongoing preliminary investigation has indicated the acceptability and feasibility of examining online search behaviors among women with gynecological symptoms. Despite the limited dataset, there seems to be a tendency toward heightened online search activity before patients with malignant cases visit a general practitioner. Future efforts will concentrate on expanding the dataset to facilitate the application of machine learning techniques for understanding trends in online search patterns. The goal is to develop a classification model capable of providing early indications for identifying malignant gynecological diagnoses.</p> |
| <p><b>Identifying amyotrophic lateral sclerosis through interactions with an internet search engine</b></p> <p><a href="https://doi.org/10.1002/mus.27991">https://doi.org/10.1002/mus.27991</a></p>           | <p>The study investigated the feasibility of using internet search engine interactions to identify individuals with amyotrophic lateral sclerosis (ALS), with the goal of reducing the time from symptom onset to diagnosis. Through analysis of search engine query data from ALS patients and control groups, the study developed a model that distinguishes between ALS cases and controls with promising accuracy (AUC of 0.81). Prospective validation supports the potential of search engine interactions as a screening tool for ALS, although distinguishing ALS from disease mimics remains challenging. These findings underscore the need for further research to explore the role of search engine data in ALS diagnosis and in reducing diagnostic delays.</p>                                                                                                         |

| Title                                                                                                                                                                                                                                | Brief Synopsis                                                                                                                                                                                                                                                                                                                                                                                                                                                                                                                                                                                                                                                                                                                                                                                                                                                                                                                                                                                                                                                                                                                                                                                                                                                                                                                                                                                                                                                                 |
|--------------------------------------------------------------------------------------------------------------------------------------------------------------------------------------------------------------------------------------|--------------------------------------------------------------------------------------------------------------------------------------------------------------------------------------------------------------------------------------------------------------------------------------------------------------------------------------------------------------------------------------------------------------------------------------------------------------------------------------------------------------------------------------------------------------------------------------------------------------------------------------------------------------------------------------------------------------------------------------------------------------------------------------------------------------------------------------------------------------------------------------------------------------------------------------------------------------------------------------------------------------------------------------------------------------------------------------------------------------------------------------------------------------------------------------------------------------------------------------------------------------------------------------------------------------------------------------------------------------------------------------------------------------------------------------------------------------------------------|
| <p><b>Identifying sleep disorders from search engine activity: combining user-generated data with a clinically validated questionnaire</b></p> <p><a href="https://doi.org/10.2196/41288">https://doi.org/10.2196/41288</a></p>      | <p>This study explored the potential of utilizing search engine activity alongside a web-based sleep questionnaire to conduct wide-scale screening for common sleep disorders. By analyzing data from 397 participants who completed the questionnaire, the study demonstrated that diurnal patterns of individuals with sleep disorders are shifted by 2 to 3 hours compared to controls. While search engine data alone may not suffice for screening, targeted advertisements coupled with web-based tools could aid in early detection and encourage individuals to seek further assessment for sleep disorders.</p>                                                                                                                                                                                                                                                                                                                                                                                                                                                                                                                                                                                                                                                                                                                                                                                                                                                       |
| <p><b>Individual-level anxiety detection and prediction from longitudinal YouTube and Google search engagement logs</b></p> <p><a href="https://doi.org/10.48550/arXiv.2007.00613">https://doi.org/10.48550/arXiv.2007.00613</a></p> | <p>The paper introduced an innovative method aimed at identifying individuals experiencing anxiety and assessing the severity of their anxiety levels by analyzing their personal online activity histories obtained from popular platforms such as YouTube and Google Search. These platforms serve millions of users daily. The study conducted a longitudinal analysis, gathering multiple sets of anonymized YouTube and Google Search logs from volunteers, alongside clinically validated anxiety assessment scores. Subsequently, the researchers devised distinct features capturing the temporal and contextual aspects of online behaviors. Utilizing these features, the team trained models capable of (i) detecting individuals with anxiety disorder, achieving an average F1 score of <math>0.83 \pm 0.09</math>, and (ii) estimating anxiety levels by predicting the widely accepted Generalized Anxiety Disorder 7-item scores (ranging from 0 to 21) with a mean square error of <math>1.87 \pm 0.15</math>, leveraging ubiquitous individual-level online engagement data. The proposed framework for assessing anxiety proves to be cost-effective, time-efficient, and scalable, and it holds promise for real-world implementation in clinical settings. This approach enables healthcare providers and therapists to non-invasively understand patients' anxiety disorders at any given moment, providing valuable insights for personalized care.</p> |
| <p><b>Inferring individual attributes from search engine queries and auxiliary information</b></p> <p><a href="https://doi.org/10.1145/3038912.3052629">https://doi.org/10.1145/3038912.3052629</a></p>                              | <p>The study introduced an algorithm designed to identify specific traits of interest in anonymous internet users, which is essential for conducting research on various human behaviors including medical conditions. By leveraging labeled examples and statistical data about the population, the algorithm can accurately assign labels to unseen examples, facilitating research in domains where direct identification is challenging due to privacy concerns. The algorithm's applications in the medical domain demonstrate its effectiveness in identifying potential cancer patients based on</p>                                                                                                                                                                                                                                                                                                                                                                                                                                                                                                                                                                                                                                                                                                                                                                                                                                                                    |

| Title                                                                                                                                                                                                                                                                               | Brief Synopsis                                                                                                                                                                                                                                                                                                                                                                                                                                                                                                                                                                                                                                                             |
|-------------------------------------------------------------------------------------------------------------------------------------------------------------------------------------------------------------------------------------------------------------------------------------|----------------------------------------------------------------------------------------------------------------------------------------------------------------------------------------------------------------------------------------------------------------------------------------------------------------------------------------------------------------------------------------------------------------------------------------------------------------------------------------------------------------------------------------------------------------------------------------------------------------------------------------------------------------------------|
|                                                                                                                                                                                                                                                                                     | search patterns and in predicting disease distributions within a population, offering valuable insights for early disease screening and epidemiological studies.                                                                                                                                                                                                                                                                                                                                                                                                                                                                                                           |
| <p><b>Internet search activity of young people with mood disorders who are hospitalized for suicidal thoughts and behaviors: qualitative study of Google search activity</b></p> <p><a href="https://mental.jmir.org/2021/10/e28262">https://mental.jmir.org/2021/10/e28262</a></p> | <p>This study found that a significant proportion (27 out of 43, equivalent to 63%) of the participants engaged in searches related to suicide. A deeper comprehension of the searching behavior among individuals contemplating suicide can enhance strategies for outreach, evaluation, and intervention for those at risk. The utilization of search data could also offer advantages in the continuous care provided to individuals dealing with suicidal thoughts or tendencies.</p>                                                                                                                                                                                  |
| <p><b>Internet searches and their relationship to cognitive function in older adults: cross-sectional analysis</b></p> <p><a href="https://doi.org/10.2196/jmir.7671">https://doi.org/10.2196/jmir.7671</a></p>                                                                     | <p>Internet searches were correlated with cognitive decline. The results suggest that early decline in cognitive function may be detected from the terms people search for when they use the Internet. By continuously tracking the basic aspects of Internet search terms, it may be possible to detect cognitive decline earlier than currently possible, thereby enabling proactive treatment and intervention.</p>                                                                                                                                                                                                                                                     |
| <p><b>Internet searches for medical symptoms before seeking information on 12-step addiction treatment programs: a web-search log analysis</b></p> <p><a href="https://doi.org/10.2196/10946">https://doi.org/10.2196/10946</a></p>                                                 | <p>This study examined the search patterns of people prior to treatment for addiction. The results suggest that many common or non-severe medical symptoms and conditions motivate subsequent interest in addiction prevention programs. In addition to highlighting severe long-term consequences, brief interventions could be restructured to highlight how increasing substance misuse can worsen discomfort from common medical symptoms in the short term, as well as how these worsening symptoms could exacerbate social embarrassment or decrease physical attractiveness.</p>                                                                                    |
| <p><b>Intimate partner violence as reflected in Internet search data</b></p> <p><a href="https://doi.org/10.1177/08944393221084074">https://doi.org/10.1177/08944393221084074</a></p>                                                                                               | <p>Queries from Bing search engine data of more than 50,000 US-based individuals suffering from IPV were extracted and analyzed. Approximately half of the users begin to search for IPV following an acute event (physical violence or abuse), and 20% of users actively hide their interest in IPV. The topics of interest to people who experience IPV include the effects of IPV, help-seeking, and methods to escape from IPV. Early cues of IPV may be difficult to detect within search queries, and in the late stage in which many IPV users are identified, interventions such as ads to guide people to safely exit violent situations could be beneficial.</p> |

| Title                                                                                                                                                                                                                                                                                               | Brief Synopsis                                                                                                                                                                                                                                                                                                                                                                                                                                                                                                                                                                                                                                                             |
|-----------------------------------------------------------------------------------------------------------------------------------------------------------------------------------------------------------------------------------------------------------------------------------------------------|----------------------------------------------------------------------------------------------------------------------------------------------------------------------------------------------------------------------------------------------------------------------------------------------------------------------------------------------------------------------------------------------------------------------------------------------------------------------------------------------------------------------------------------------------------------------------------------------------------------------------------------------------------------------------|
| <p><b>Patterns of information-seeking for cancer on the Internet: an analysis of real world data</b></p> <p><a href="https://doi.org/10.1371/journal.pone.0045921">https://doi.org/10.1371/journal.pone.0045921</a></p>                                                                             | <p>This study investigated the searches people made on Yahoo search following their cancer diagnosis or a cancer diagnosis of their acquaintances. It shows that search data can be used to investigate medical questions on a large scale. By understanding the patterns of internet use, physicians can use this tool as a powerful partner rather than a source of distress in the care of their patients. Moreover, internet content providers need to personalize their content by taking patient search history into account, because, as the findings demonstrate, information needs change over time.</p>                                                          |
| <p><b>Perceived utility and characterization of personal Google search histories to detect data patterns proximal to a suicide attempt in individuals who previously attempted suicide: pilot cohort study</b></p> <p><a href="https://doi.org/10.2196/27918">https://doi.org/10.2196/27918</a></p> | <p>The aim in conducting this research was to assess the viability and approval of utilizing individualized online information-seeking actions to identify the likelihood of suicide attempts. Variations in online search habits could serve as a viable and permissible method for detecting the risk of suicide. A personalized examination of online information-seeking conduct revealed significant alterations in search behaviors and search phrases associated with early indicators of suicide, noticeable within the period spanning from 2 months to 7 days prior to a suicide attempt.</p>                                                                    |
| <p><b>Predicting eating disorders from Internet activity</b></p> <p><a href="https://doi.org/10.1002/eat.23338">https://doi.org/10.1002/eat.23338</a></p>                                                                                                                                           | <p>The algorithm built from internet activity reached an accuracy of 52.6% in predicting eating disorder risk/diagnostic status. The most predictive internet search history variables were the following: use of keywords related to eating disorder symptoms and websites promoting eating disorder content, participant age, median browsing events per day, and fraction of daily activity at noon.</p>                                                                                                                                                                                                                                                                |
| <p><b>Screening for cancer using a learning Internet advertising system</b></p> <p><a href="https://doi.org/10.1145/3373720">https://doi.org/10.1145/3373720</a></p>                                                                                                                                | <p>The study demonstrated the effectiveness of using online advertising systems such as Bing and Google ads in identifying individuals who may have symptoms consistent with suspected cancer. By providing clinically verified questionnaires and analyzing responses, a classifier trained on past Bing queries achieved a predictive accuracy of 0.64 for suspected cancer. Furthermore, leveraging questionnaire responses within Google's advertisement system enabled the identification of individuals likely to have suspected cancer, highlighting the potential of modern advertising platforms to aid in the early detection of serious medical conditions.</p> |

| Title                                                                                                                                                                                                                                                        | Brief Synopsis                                                                                                                                                                                                                                                                                                                                                                                                                                                                                                                                                          |
|--------------------------------------------------------------------------------------------------------------------------------------------------------------------------------------------------------------------------------------------------------------|-------------------------------------------------------------------------------------------------------------------------------------------------------------------------------------------------------------------------------------------------------------------------------------------------------------------------------------------------------------------------------------------------------------------------------------------------------------------------------------------------------------------------------------------------------------------------|
| <p><b>Screening for pancreatic adenocarcinoma using signals from Web search logs: feasibility study and results</b></p> <p><a href="https://doi.org/10.1200/JOP.2015.010504">https://doi.org/10.1200/JOP.2015.010504</a></p>                                 | <p>Signals in search logs show the possibilities of predicting a forthcoming diagnosis of pancreatic adenocarcinoma from combinations of subtle temporal signals revealed in the queries of searchers.</p>                                                                                                                                                                                                                                                                                                                                                              |
| <p><b>Seeking insights about cycling mood disorders via anonymized search logs</b></p> <p><a href="https://doi.org/10.2196/jmir.2664">https://doi.org/10.2196/jmir.2664</a></p>                                                                              | <p>This study examined Bing searches of people with cycling mood disorders.</p>                                                                                                                                                                                                                                                                                                                                                                                                                                                                                         |
| <p><b>Symptoms prompting interest in celiac disease and the gluten-free diet: analysis of internet search term data</b></p> <p><a href="https://doi.org/10.2196/13082">https://doi.org/10.2196/13082</a></p>                                                 | <p>An examination of Bing searches related to celiac disease found an increase in antecedent searches for symptoms known to be associated with celiac disease, a rise in searches for depression and anxiety, and an increase in symptoms that are associated with celiac disease but may not be reported to healthcare providers. The protean clinical manifestations of celiac disease are reflected in the diffuse nature of antecedent internet queries of those interested in celiac disease, underscoring the challenge of effective case-finding strategies.</p> |
| <p><b>The relationships of deteriorating depression and anxiety with longitudinal behavioral changes in Google and YouTube use during COVID-19: observational study</b></p> <p><a href="https://doi.org/10.2196/24012">https://doi.org/10.2196/24012</a></p> | <p>This study investigated the relationship between changes in Google search and YouTube engagement behaviors and the exacerbation of depression and anxiety levels among college students during the COVID-19 pandemic. Through longitudinal data collection and correlation analysis, the study identified significant associations between deteriorating mental health profiles and shifts in online behavior, suggesting the potential utility of these behavioral changes as predictive indicators of mental health conditions.</p>                                |
| <p><b>The role of web-based health information in help-seeking behavior prior to a diagnosis of lung cancer: a mixed-methods study</b></p> <p><a href="https://doi.org/10.2196/jmir.6336">https://doi.org/10.2196/jmir.6336</a></p>                          | <p>This study investigated the role of web-based information in the pathway to diagnosis for lung cancer patients. Findings indicated that although only a minority (20.4%) reported using the web before diagnosis, both patients and their next-of-kin perceived its impact across all intervals of the diagnostic pathway. The study suggests that while the current role of the web in pre-diagnosis is limited, it holds potential for reducing</p>                                                                                                                |

| Title                                                                                                                                                                                                                                                                                                                              | Brief Synopsis                                                                                                                                                                                                                                                                                                                                                                                                                                                                                                                                                                                                                                                                                                                                                                                                                                                                                                                                                                                                                                                                                                         |
|------------------------------------------------------------------------------------------------------------------------------------------------------------------------------------------------------------------------------------------------------------------------------------------------------------------------------------|------------------------------------------------------------------------------------------------------------------------------------------------------------------------------------------------------------------------------------------------------------------------------------------------------------------------------------------------------------------------------------------------------------------------------------------------------------------------------------------------------------------------------------------------------------------------------------------------------------------------------------------------------------------------------------------------------------------------------------------------------------------------------------------------------------------------------------------------------------------------------------------------------------------------------------------------------------------------------------------------------------------------------------------------------------------------------------------------------------------------|
|                                                                                                                                                                                                                                                                                                                                    | delays in diagnosis, especially as technology familiarity increases, and proposes the division of the diagnostic interval into two subintervals for future exploration.                                                                                                                                                                                                                                                                                                                                                                                                                                                                                                                                                                                                                                                                                                                                                                                                                                                                                                                                                |
| <p data-bbox="201 313 789 386"><b>Using online search activity for earlier detection of gynaecological malignancy</b></p> <p data-bbox="201 418 768 451"><a href="https://doi.org/10.21203/rs.3.rs-2765605/v1">https://doi.org/10.21203/rs.3.rs-2765605/v1</a></p>                                                                 | <p data-bbox="810 313 1917 638">This study examined the potential of online search data to detect gynaecological cancer in individuals with confirmed diagnoses, suggesting that differences in search patterns were noticeable as early as 360 days before primary care referral. Using a classification model, the study achieved its highest accuracy in predicting cancer risk using data from 60 days before referral, particularly in individuals who frequently searched for health-related topics online. The findings suggest that online search data could offer personalized risk profiles for gynaecological cancer, offering a complementary approach to conventional screening methods and potentially aiding in the earlier detection of various conditions, including cancer.</p>                                                                                                                                                                                                                                                                                                                      |
| <p data-bbox="201 646 789 824"><b>Utilizing machine learning on internet search activity to support the diagnostic process and relapse detection in young individuals with early psychosis: feasibility study</b></p> <p data-bbox="201 857 600 889"><a href="https://doi.org/10.2196/19348">https://doi.org/10.2196/19348</a></p> | <p data-bbox="810 646 1917 1110">The primary objective of this study was to create computational algorithms utilizing internet search patterns, aiming to aid diagnostic processes and recognize potential relapses among individuals diagnosed with schizophrenia spectrum disorders. The research revealed discernible distinctions in the timing, frequency, and nature of online search behavior among young individuals (ages 15-35) with schizophrenia spectrum disorders when compared to their healthy counterparts. Furthermore, alterations in language use and behavioral patterns were detected in the month preceding a relapse leading to hospitalization in individuals diagnosed with schizophrenia spectrum disorders. The study suggests that online search activity holds potential as a means to gather objective and easily accessible markers of psychiatric symptoms. The integration of search behavior as supplementary information related to behavioral health could represent a significant advancement in utilizing unbiased digital data to enhance the monitoring of mental health.</p> |
